# Supplementary material
Source: publisher figshare collection journal article supplement (https://acs.figshare.com/ndownloader/files/3725533)
Supplement: Supplementary file 1 [file 3725533]

Archive with 28 entries (28 files):
- Ce623P_checkcif.pdf
- ce623sb.txt
- Ce623Sb_checkcif.pdf
- ce623si.txt
- Ce623Si_checkcif.pdf
- ce623sn.txt
- Ce623Sn_checkcif.pdf
- gd6mg23c.txt
- Gd6Mg23C_checkcif.pdf
- la6mg23c.txt
- La6Mg23C_checkcif.pdf
- la6mg23p.txt
- La6Mg23P_checkcif.pdf
- la623sb.txt
- La623Sb_checkcif.pdf
- nd6mg23c.txt
- Nd6Mg23C_checkcif.pdf
- pr6mg23c.txt
- Pr6Mg23C_checkcif.pdf
- sm6mg23c.txt
- Sm6Mg23C_checkcif.pdf
- ce6mg23c.txt
- Ce6Mg23C_checkcif.pdf
- ce623as.txt
- Ce623As_checkcif.pdf
- ce623ge.txt
- Ce623Ge_checkcif.pdf
- ce623p.txt
