# Supplementary material
Source: publisher figshare collection journal article supplement (https://acs.figshare.com/ndownloader/files/3725533)
Supplement: Supplementary file 1 [file 3725533 › ce623si.txt]

data_Ce6Mg23Si                     
 
#=============================================================================
 
# 5. CHEMICAL DATA
 
_chemical_formula_sum             'Ce6 Mg23 Si'
_chemical_formula_weight         1427.94
 
loop_
    _atom_type_symbol               
    _atom_type_scat_Cromer_Mann_a1 
    _atom_type_scat_Cromer_Mann_b1 
    _atom_type_scat_Cromer_Mann_a2 
    _atom_type_scat_Cromer_Mann_b2 
    _atom_type_scat_Cromer_Mann_a3 
    _atom_type_scat_Cromer_Mann_b3 
    _atom_type_scat_Cromer_Mann_a4 
    _atom_type_scat_Cromer_Mann_b4 
    _atom_type_scat_Cromer_Mann_c 
    _atom_type_scat_dispersion_real 
    _atom_type_scat_dispersion_imag 
    _atom_type_scat_source          
ce    21.16710   2.81219  19.76950   0.22684  11.85130  17.60830
       3.33049 127.11300   1.86264  -2.17000   9.64800
 International_Tables_for_Crystallography_Vol.C(1991)_Tables_6.1.1.4_and_6.1.1.5
mg     5.42040   2.82750   2.17350  79.26110   1.22690   0.38080
       2.30730   7.19370   0.85840   0.16500   0.17700
 International_Tables_for_Crystallography_Vol.C(1991)_Tables_6.1.1.4_and_6.1.1.5
si     6.29150   2.43860   3.03530  32.33370   1.98910   0.67850
       1.54100  81.69370   1.14070   0.24400   0.33000
 International_Tables_for_Crystallography_Vol.C(1991)_Tables_6.1.1.4_and_6.1.1.5
 
#=============================================================================
 
# 6. POWDER SPECIMEN AND CRYSTAL DATA
 
_symmetry_cell_setting                Cubic
_symmetry_space_group_name_H-M       'F M -3 M'
_symmetry_space_group_name_Hall      '-F 4 2 3'
 
loop_
    _symmetry_equiv_pos_as_xyz   #<--must include 'x,y,z'
'x,y,z'
'x,-y,-z'
'-x,y,-z'
'-x,-y,z'
'y,z,x'
'-y,-z,x'
'y,-z,-x'
'-y,z,-x'
'z,x,y'
'-z,x,-y'
'-z,-x,y'
'z,-x,-y'
'y,x,z'
'-y,x,-z'
'y,-x,-z'
'-y,-x,z'
'z,y,x'
'-z,-y,x'
'-z,y,-x'
'z,-y,-x'
'x,z,y'
'x,-z,-y'
'-x,-z,y'
'-x,z,-y'
'-x,-y,-z'
'-x,y,z'
'x,-y,z'
'x,y,-z'
'-y,-z,-x'
'y,z,-x'
'-y,z,x'
'y,-z,x'
'-z,-x,-y'
'z,-x,y'
'z,x,-y'
'-z,x,y'
'-y,-x,-z'
'y,-x,z'
'-y,x,z'
'y,x,-z'
'-z,-y,-x'
'z,y,-x'
'z,-y,x'
'-z,y,x'
'-x,-z,-y'
'-x,z,y'
'x,z,-y'
'x,-z,y'
'x+1/2,y+1/2,z'
'x+1/2,-y+1/2,-z'
'-x+1/2,y+1/2,-z'
'-x+1/2,-y+1/2,z'
'y+1/2,z+1/2,x'
'-y+1/2,-z+1/2,x'
'y+1/2,-z+1/2,-x'
'-y+1/2,z+1/2,-x'
'z+1/2,x+1/2,y'
'-z+1/2,x+1/2,-y'
'-z+1/2,-x+1/2,y'
'z+1/2,-x+1/2,-y'
'y+1/2,x+1/2,z'
'-y+1/2,x+1/2,-z'
'y+1/2,-x+1/2,-z'
'-y+1/2,-x+1/2,z'
'z+1/2,y+1/2,x'
'-z+1/2,-y+1/2,x'
'-z+1/2,y+1/2,-x'
'z+1/2,-y+1/2,-x'
'x+1/2,z+1/2,y'
'x+1/2,-z+1/2,-y'
'-x+1/2,-z+1/2,y'
'-x+1/2,z+1/2,-y'
'-x+1/2,-y+1/2,-z'
'-x+1/2,y+1/2,z'
'x+1/2,-y+1/2,z'
'x+1/2,y+1/2,-z'
'-y+1/2,-z+1/2,-x'
'y+1/2,z+1/2,-x'
'-y+1/2,z+1/2,x'
'y+1/2,-z+1/2,x'
'-z+1/2,-x+1/2,-y'
'z+1/2,-x+1/2,y'
'z+1/2,x+1/2,-y'
'-z+1/2,x+1/2,y'
'-y+1/2,-x+1/2,-z'
'y+1/2,-x+1/2,z'
'-y+1/2,x+1/2,z'
'y+1/2,x+1/2,-z'
'-z+1/2,-y+1/2,-x'
'z+1/2,y+1/2,-x'
'z+1/2,-y+1/2,x'
'-z+1/2,y+1/2,x'
'-x+1/2,-z+1/2,-y'
'-x+1/2,z+1/2,y'
'x+1/2,z+1/2,-y'
'x+1/2,-z+1/2,y'
'x+1/2,y,z+1/2'
'x+1/2,-y,-z+1/2'
'-x+1/2,y,-z+1/2'
'-x+1/2,-y,z+1/2'
'y+1/2,z,x+1/2'
'-y+1/2,-z,x+1/2'
'y+1/2,-z,-x+1/2'
'-y+1/2,z,-x+1/2'
'z+1/2,x,y+1/2'
'-z+1/2,x,-y+1/2'
'-z+1/2,-x,y+1/2'
'z+1/2,-x,-y+1/2'
'y+1/2,x,z+1/2'
'-y+1/2,x,-z+1/2'
'y+1/2,-x,-z+1/2'
'-y+1/2,-x,z+1/2'
'z+1/2,y,x+1/2'
'-z+1/2,-y,x+1/2'
'-z+1/2,y,-x+1/2'
'z+1/2,-y,-x+1/2'
'x+1/2,z,y+1/2'
'x+1/2,-z,-y+1/2'
'-x+1/2,-z,y+1/2'
'-x+1/2,z,-y+1/2'
'-x+1/2,-y,-z+1/2'
'-x+1/2,y,z+1/2'
'x+1/2,-y,z+1/2'
'x+1/2,y,-z+1/2'
'-y+1/2,-z,-x+1/2'
'y+1/2,z,-x+1/2'
'-y+1/2,z,x+1/2'
'y+1/2,-z,x+1/2'
'-z+1/2,-x,-y+1/2'
'z+1/2,-x,y+1/2'
'z+1/2,x,-y+1/2'
'-z+1/2,x,y+1/2'
'-y+1/2,-x,-z+1/2'
'y+1/2,-x,z+1/2'
'-y+1/2,x,z+1/2'
'y+1/2,x,-z+1/2'
'-z+1/2,-y,-x+1/2'
'z+1/2,y,-x+1/2'
'z+1/2,-y,x+1/2'
'-z+1/2,y,x+1/2'
'-x+1/2,-z,-y+1/2'
'-x+1/2,z,y+1/2'
'x+1/2,z,-y+1/2'
'x+1/2,-z,y+1/2'
'x,y+1/2,z+1/2'
'x,-y+1/2,-z+1/2'
'-x,y+1/2,-z+1/2'
'-x,-y+1/2,z+1/2'
'y,z+1/2,x+1/2'
'-y,-z+1/2,x+1/2'
'y,-z+1/2,-x+1/2'
'-y,z+1/2,-x+1/2'
'z,x+1/2,y+1/2'
'-z,x+1/2,-y+1/2'
'-z,-x+1/2,y+1/2'
'z,-x+1/2,-y+1/2'
'y,x+1/2,z+1/2'
'-y,x+1/2,-z+1/2'
'y,-x+1/2,-z+1/2'
'-y,-x+1/2,z+1/2'
'z,y+1/2,x+1/2'
'-z,-y+1/2,x+1/2'
'-z,y+1/2,-x+1/2'
'z,-y+1/2,-x+1/2'
'x,z+1/2,y+1/2'
'x,-z+1/2,-y+1/2'
'-x,-z+1/2,y+1/2'
'-x,z+1/2,-y+1/2'
'-x,-y+1/2,-z+1/2'
'-x,y+1/2,z+1/2'
'x,-y+1/2,z+1/2'
'x,y+1/2,-z+1/2'
'-y,-z+1/2,-x+1/2'
'y,z+1/2,-x+1/2'
'-y,z+1/2,x+1/2'
'y,-z+1/2,x+1/2'
'-z,-x+1/2,-y+1/2'
'z,-x+1/2,y+1/2'
'z,x+1/2,-y+1/2'
'-z,x+1/2,y+1/2'
'-y,-x+1/2,-z+1/2'
'y,-x+1/2,z+1/2'
'-y,x+1/2,z+1/2'
'y,x+1/2,-z+1/2'
'-z,-y+1/2,-x+1/2'
'z,y+1/2,-x+1/2'
'z,-y+1/2,x+1/2'
'-z,y+1/2,x+1/2'
'-x,-z+1/2,-y+1/2'
'-x,z+1/2,y+1/2'
'x,z+1/2,-y+1/2'
'x,-z+1/2,y+1/2'
 
_cell_length_a                       14.586(9)
_cell_length_b                       14.586(9)
_cell_length_c                       14.586(9)
_cell_angle_alpha                    90.00000
_cell_angle_beta                     90.00000
_cell_angle_gamma                    90.00000
_cell_volume                         3103(6)
_cell_formula_units_Z                4
_cell_measurement_temperature        298

_pd_spec_size_thick               0.01    # parallel to 
                                          # scattering vector
                                          # in reflection
 
_pd_spec_mount_mode                'reflection'
_pd_spec_shape                     'flat_sheet' 

_pd_char_colour                    'dark grey'
 
_pd_prep_temperature              298
 
#=============================================================================
 
# 7. EXPERIMENTAL DATA
 
_pd_calibration_special_details           
; 
Calibration with silicon as internal standard
;
 
_diffrn_ambient_temperature          298
_diffrn_source                   'sealed X-ray tube'
_diffrn_radiation_wavelength      1.5418
_diffrn_source_target             Cu
 
_diffrn_measurement_device_type          'Bragg-Brentano PanAlytical diddractometer'

_pd_meas_scan_method                    'step'

_pd_meas_number_of_points         4595
_pd_meas_2theta_range_min         8.12000
_pd_meas_2theta_range_max         100.00000
_pd_meas_2theta_range_inc         0.020004
 
#=============================================================================
 
# 8. REFINEMENT DATA
 
_pd_proc_ls_profile_function                'Pseudo-Voigt'
_pd_proc_ls_background_function           
;
linear interpolation between a set of background points with refinable heights
;


#  The following profile R-factors are NOT CORRECTED for background
#  The sum is extended to all non-excluded points.
#  These are the current CIF standard
 
_pd_proc_ls_prof_R_factor                2.7240
_pd_proc_ls_prof_wR_factor               4.1705
_pd_proc_ls_prof_wR_expected             1.7689
 
#  The following profile R-factors are CORRECTED for background
#  The sum is extended to all non-excluded points.
#  These items are not in the current CIF standard, but are defined above
 
_pd_proc_ls_prof_cR_factor               18.9374
_pd_proc_ls_prof_cwR_factor              15.1563
_pd_proc_ls_prof_cwR_expected             6.4287
 
#  The following items are not in the CIF standard, but are defined above
 
_pd_proc_ls_prof_chi2                 5.5583
_pd_proc_ls_prof_echi2                6.2257
 
#  Items related to LS refinement
 
_refine_ls_R_I_factor                 5.2150
_refine_ls_number_reflns                   230
_refine_ls_number_parameters                17
_refine_ls_number_restraints                 0
_refine_ls_goodness_of_fit_all        2.36
_refine_ls_shift/su_max               0.05

 
# The following four items apply to angular dispersive measurements.
# 2theta minimum, maximum and increment (in degrees) are for the 
# intensities used in the refinement.
 
_pd_proc_2theta_range_min                8.1155
_pd_proc_2theta_range_max               99.9955
_pd_proc_2theta_range_inc              0.020004
_pd_proc_wavelength                    1.540560
 

_computing_structure_refinement      FULLPROF
 
#=============================================================================
 
# 9. ATOMIC COORDINATES AND DISPLACEMENT PARAMETERS
 
loop_
    _atom_site_label
    _atom_site_fract_x
    _atom_site_fract_y
    _atom_site_fract_z
    _atom_site_U_iso_or_equiv
    _atom_site_occupancy
    _atom_site_adp_type              # Not in version 2.0.1
    _atom_site_type_symbol
 Ce   0.20637(9)  0.00000     0.00000     0.0152(5)   1.00000    Uiso CE  
 Mg1   0.1721(2)   0.1721(2)   0.1721(2)   0.0219(14)  1.00000    Uiso MG  
 Mg2   0.37880(18) 0.37880(18) 0.37880(18) 0.0219(14)  1.00000    Uiso MG  
 Mg3   0.00000     0.25000     0.25000     0.0219(14)  1.00000    Uiso MG  
 Mg4   0.50000     0.50000     0.50000     0.0219(14)  1.00000    Uiso MG  
 Si   0.00000     0.00000     0.00000     0.097(11)   1.00000    Uiso SI  
 
# Note: if the displacement parameters were refined anisotropically
# the U matrices should be given as for single-crystal studies.
 
#=============================================================================
 
# 10. DISTANCES AND ANGLES / MOLECULAR GEOMETRY 
 

loop_
   _geom_bond_atom_site_label_1
   _geom_bond_atom_site_label_2
   _geom_bond_distance
   _geom_bond_site_symmetry_2
   _geom_bond_publ_flag
Ce    Ce    4.2572(13)    5_555 ?
Ce    Ce    4.2572(13)    7_555 ?
Ce    Ce    4.2572(13)    9_555 ?
Ce    Ce    4.2572(13)   11_555 ?
Ce    Mg1   3.585(3)      1_555 ?
Ce    Mg1   3.585(3)      2_555 ?
Ce    Mg1   3.585(3)     27_555 ?
Ce    Mg1   3.585(3)     28_555 ?
Ce    Mg2   3.546(3)    145_544 ?
Ce    Mg2   3.546(3)    146_555 ?
Ce    Mg2   3.546(3)    171_554 ?
Ce    Mg2   3.546(3)    172_545 ?
Ce    Mg3   3.702(2)      5_555 ?
Ce    Mg3   3.702(2)      7_555 ?
Ce    Mg3   3.702(2)      9_555 ?
Ce    Mg3   3.702(2)     12_555 ?
Ce    Mg4   4.283(3)    145_544 ?
Ce    Si    3.010(2)      1_555 ?
Mg1   Ce    3.585(3)      1_555 ?
Mg1   Ce    3.585(3)      5_555 ?
Mg1   Ce    3.585(3)      9_555 ?
Mg1   Mg1   3.214(4)     52_555 ?
Mg1   Mg1   3.214(4)     99_555 ?
Mg1   Mg1   3.214(4)    146_555 ?
Mg1   Mg2   3.193(4)     52_555 ?
Mg1   Mg2   3.193(4)     99_555 ?
Mg1   Mg2   3.193(4)    146_555 ?
Mg1   Mg3   2.981(3)      1_555 ?
Mg1   Mg3   2.981(3)      5_555 ?
Mg1   Mg3   2.981(3)      9_555 ?
Mg1   Si    4.348(3)      1_555 ?
Mg2   Ce    3.546(3)     53_555 ?
Mg2   Ce    3.546(3)    105_555 ?
Mg2   Ce    3.546(3)    145_555 ?
Mg2   Mg1   3.193(4)     52_555 ?
Mg2   Mg1   3.193(4)     99_555 ?
Mg2   Mg1   3.193(4)    146_555 ?
Mg2   Mg2   3.536(4)     26_655 ?
Mg2   Mg2   3.536(4)     27_565 ?
Mg2   Mg2   3.536(4)     28_556 ?
Mg2   Mg3   3.191(3)     52_555 ?
Mg2   Mg3   3.191(3)     59_555 ?
Mg2   Mg3   3.191(3)    104_555 ?
Mg2   Mg4   3.062(3)      1_555 ?
Mg3   Ce    3.702(2)      5_555 ?
Mg3   Ce    3.702(2)      9_555 ?
Mg3   Ce    3.702(2)    151_555 ?
Mg3   Ce    3.702(2)    155_555 ?
Mg3   Mg1   2.981(3)      1_555 ?
Mg3   Mg1   2.981(3)     26_555 ?
Mg3   Mg1   2.981(3)    146_555 ?
Mg3   Mg1   2.981(3)    169_555 ?
Mg3   Mg2   3.191(3)     52_555 ?
Mg3   Mg2   3.191(3)     75_455 ?
Mg3   Mg2   3.191(3)     99_555 ?
Mg3   Mg2   3.191(3)    124_455 ?
Mg4   Ce    4.283(3)     53_555 ?
Mg4   Ce    4.283(3)     55_556 ?
Mg4   Ce    4.283(3)    105_555 ?
Mg4   Ce    4.283(3)    107_565 ?
Mg4   Ce    4.283(3)    145_555 ?
Mg4   Ce    4.283(3)    147_655 ?
Mg4   Mg2   3.062(3)      1_555 ?
Mg4   Mg2   3.062(3)      2_566 ?
Mg4   Mg2   3.062(3)      3_656 ?
Mg4   Mg2   3.062(3)      4_665 ?
Mg4   Mg2   3.062(3)     25_666 ?
Mg4   Mg2   3.062(3)     26_655 ?
Mg4   Mg2   3.062(3)     27_565 ?
Mg4   Mg2   3.062(3)     28_556 ?
Si    Ce    3.010(2)      1_555 ?
Si    Ce    3.010(2)      3_555 ?
Si    Ce    3.010(2)      5_555 ?
Si    Ce    3.010(2)      7_555 ?
Si    Ce    3.010(2)      9_555 ?
Si    Ce    3.010(2)     11_555 ?
Si    Mg1   4.348(3)      1_555 ?
Si    Mg1   4.348(3)      2_555 ?
Si    Mg1   4.348(3)      3_555 ?
Si    Mg1   4.348(3)      4_555 ?
Si    Mg1   4.348(3)     25_555 ?
Si    Mg1   4.348(3)     26_555 ?
Si    Mg1   4.348(3)     27_555 ?
Si    Mg1   4.348(3)     28_555 ?

loop_
   _geom_angle_atom_site_label_1
   _geom_angle_atom_site_label_2
   _geom_angle_atom_site_label_3
   _geom_angle
   _geom_angle_site_symmetry_1
   _geom_angle_site_symmetry_3
   _geom_angle_publ_flag
 Ce   Ce   Ce   90.00(2)       5_555    7_555 ?
 Ce   Ce   Ce   60.00(2)       5_555    9_555 ?
 Ce   Ce   Ce   60.00(2)       5_555   11_555 ?
 Ce   Ce   Mg1  53.58(6)       5_555    1_555 ?
 Ce   Ce   Mg1  113.36(9)      5_555    2_555 ?
 Ce   Ce   Mg1  53.58(6)       5_555   27_555 ?
 Ce   Ce   Mg1  113.36(9)      5_555   28_555 ?
 Ce   Ce   Mg2  148.65(9)      5_555  145_544 ?
 Ce   Ce   Mg2  98.57(8)       5_555  146_555 ?
 Ce   Ce   Mg2  148.65(9)      5_555  171_554 ?
 Ce   Ce   Mg2  98.57(8)       5_555  172_545 ?
 Ce   Ce   Mg3  96.98(3)       5_555    5_555 ?
 Ce   Ce   Mg3  96.98(3)       5_555    7_555 ?
 Ce   Ce   Mg3  54.90(3)       5_555    9_555 ?
 Ce   Ce   Mg3  144.90(3)      5_555   12_555 ?
 Ce   Ce   Mg4  135.00(4)      5_555  145_544 ?
 Ce   Ce   Si   45.00(3)       5_555    1_555 ?
 Ce   Ce   Ce   60.00(2)       7_555    9_555 ?
 Ce   Ce   Ce   60.00(2)       7_555   11_555 ?
 Ce   Ce   Mg1  113.36(9)      7_555    1_555 ?
 Ce   Ce   Mg1  53.58(6)       7_555    2_555 ?
 Ce   Ce   Mg1  113.36(9)      7_555   27_555 ?
 Ce   Ce   Mg1  53.58(6)       7_555   28_555 ?
 Ce   Ce   Mg2  98.57(8)       7_555  145_544 ?
 Ce   Ce   Mg2  148.65(9)      7_555  146_555 ?
 Ce   Ce   Mg2  98.57(8)       7_555  171_554 ?
 Ce   Ce   Mg2  148.65(9)      7_555  172_545 ?
 Ce   Ce   Mg3  96.98(3)       7_555    5_555 ?
 Ce   Ce   Mg3  96.98(3)       7_555    7_555 ?
 Ce   Ce   Mg3  144.90(3)      7_555    9_555 ?
 Ce   Ce   Mg3  54.90(3)       7_555   12_555 ?
 Ce   Ce   Mg4  135.00(4)      7_555  145_544 ?
 Ce   Ce   Si   45.00(3)       7_555    1_555 ?
 Ce   Ce   Ce   90.00(2)       9_555   11_555 ?
 Ce   Ce   Mg1  53.58(6)       9_555    1_555 ?
 Ce   Ce   Mg1  113.36(9)      9_555    2_555 ?
 Ce   Ce   Mg1  113.36(9)      9_555   27_555 ?
 Ce   Ce   Mg1  53.58(6)       9_555   28_555 ?
 Ce   Ce   Mg2  148.65(9)      9_555  145_544 ?
 Ce   Ce   Mg2  98.57(8)       9_555  146_555 ?
 Ce   Ce   Mg2  98.57(8)       9_555  171_554 ?
 Ce   Ce   Mg2  148.65(9)      9_555  172_545 ?
 Ce   Ce   Mg3  54.90(3)       9_555    5_555 ?
 Ce   Ce   Mg3  144.90(3)      9_555    7_555 ?
 Ce   Ce   Mg3  96.98(3)       9_555    9_555 ?
 Ce   Ce   Mg3  96.98(3)       9_555   12_555 ?
 Ce   Ce   Mg4  135.00(4)      9_555  145_544 ?
 Ce   Ce   Si   45.00(3)       9_555    1_555 ?
 Ce   Ce   Mg1  113.36(9)     11_555    1_555 ?
 Ce   Ce   Mg1  53.58(6)      11_555    2_555 ?
 Ce   Ce   Mg1  53.58(6)      11_555   27_555 ?
 Ce   Ce   Mg1  113.36(9)     11_555   28_555 ?
 Ce   Ce   Mg2  98.57(8)      11_555  145_544 ?
 Ce   Ce   Mg2  148.65(9)     11_555  146_555 ?
 Ce   Ce   Mg2  148.65(9)     11_555  171_554 ?
 Ce   Ce   Mg2  98.57(8)      11_555  172_545 ?
 Ce   Ce   Mg3  144.90(3)     11_555    5_555 ?
 Ce   Ce   Mg3  54.90(3)      11_555    7_555 ?
 Ce   Ce   Mg3  96.98(3)      11_555    9_555 ?
 Ce   Ce   Mg3  96.98(3)      11_555   12_555 ?
 Ce   Ce   Mg4  135.00(4)     11_555  145_544 ?
 Ce   Ce   Si   45.00(3)      11_555    1_555 ?
 Mg1  Ce   Mg1  163.97(15)     1_555    2_555 ?
 Mg1  Ce   Mg1  88.89(11)      1_555   27_555 ?
 Mg1  Ce   Mg1  88.89(11)      1_555   28_555 ?
 Mg1  Ce   Mg2  142.84(14)     1_555  145_544 ?
 Mg1  Ce   Mg2  53.19(9)       1_555  146_555 ?
 Mg1  Ce   Mg2  95.68(11)      1_555  171_554 ?
 Mg1  Ce   Mg2  95.68(11)      1_555  172_545 ?
 Mg1  Ce   Mg3  48.26(6)       1_555    5_555 ?
 Mg1  Ce   Mg3  135.54(10)     1_555    7_555 ?
 Mg1  Ce   Mg3  48.26(6)       1_555    9_555 ?
 Mg1  Ce   Mg3  135.54(10)     1_555   12_555 ?
 Mg1  Ce   Mg4  98.01(8)       1_555  145_544 ?
 Mg1  Ce   Si   81.99(9)       1_555    1_555 ?
 Mg1  Ce   Mg1  88.89(11)      2_555   27_555 ?
 Mg1  Ce   Mg1  88.89(11)      2_555   28_555 ?
 Mg1  Ce   Mg2  53.19(9)       2_555  145_544 ?
 Mg1  Ce   Mg2  142.84(14)     2_555  146_555 ?
 Mg1  Ce   Mg2  95.68(11)      2_555  171_554 ?
 Mg1  Ce   Mg2  95.68(11)      2_555  172_545 ?
 Mg1  Ce   Mg3  135.54(10)     2_555    5_555 ?
 Mg1  Ce   Mg3  48.26(6)       2_555    7_555 ?
 Mg1  Ce   Mg3  135.54(10)     2_555    9_555 ?
 Mg1  Ce   Mg3  48.26(6)       2_555   12_555 ?
 Mg1  Ce   Mg4  98.01(8)       2_555  145_544 ?
 Mg1  Ce   Si   81.99(9)       2_555    1_555 ?
 Mg1  Ce   Mg1  163.97(15)    27_555   28_555 ?
 Mg1  Ce   Mg2  95.68(11)     27_555  145_544 ?
 Mg1  Ce   Mg2  95.68(11)     27_555  146_555 ?
 Mg1  Ce   Mg2  142.84(14)    27_555  171_554 ?
 Mg1  Ce   Mg2  53.19(9)      27_555  172_545 ?
 Mg1  Ce   Mg3  135.54(10)    27_555    5_555 ?
 Mg1  Ce   Mg3  48.26(6)      27_555    7_555 ?
 Mg1  Ce   Mg3  48.26(6)      27_555    9_555 ?
 Mg1  Ce   Mg3  135.54(10)    27_555   12_555 ?
 Mg1  Ce   Mg4  98.01(8)      27_555  145_544 ?
 Mg1  Ce   Si   81.99(9)      27_555    1_555 ?
 Mg1  Ce   Mg2  95.68(11)     28_555  145_544 ?
 Mg1  Ce   Mg2  95.68(11)     28_555  146_555 ?
 Mg1  Ce   Mg2  53.19(9)      28_555  171_554 ?
 Mg1  Ce   Mg2  142.84(14)    28_555  172_545 ?
 Mg1  Ce   Mg3  48.26(6)      28_555    5_555 ?
 Mg1  Ce   Mg3  135.54(10)    28_555    7_555 ?
 Mg1  Ce   Mg3  135.54(10)    28_555    9_555 ?
 Mg1  Ce   Mg3  48.26(6)      28_555   12_555 ?
 Mg1  Ce   Mg4  98.01(8)      28_555  145_544 ?
 Mg1  Ce   Si   81.99(9)      28_555    1_555 ?
 Mg2  Ce   Mg2  89.66(11)    145_544  146_555 ?
 Mg2  Ce   Mg2  59.80(9)     145_544  171_554 ?
 Mg2  Ce   Mg2  59.80(9)     145_544  172_545 ?
 Mg2  Ce   Mg3  111.66(8)    145_544    5_555 ?
 Mg2  Ce   Mg3  52.19(6)     145_544    7_555 ?
 Mg2  Ce   Mg3  111.66(8)    145_544    9_555 ?
 Mg2  Ce   Mg3  52.19(6)     145_544   12_555 ?
 Mg2  Ce   Si   135.17(10)   145_544    1_555 ?
 Mg2  Ce   Mg2  59.80(9)     146_555  171_554 ?
 Mg2  Ce   Mg2  59.80(9)     146_555  172_545 ?
 Mg2  Ce   Mg3  52.19(6)     146_555    5_555 ?
 Mg2  Ce   Mg3  111.66(8)    146_555    7_555 ?
 Mg2  Ce   Mg3  52.19(6)     146_555    9_555 ?
 Mg2  Ce   Mg3  111.66(8)    146_555   12_555 ?
 Mg2  Ce   Si   135.17(10)   146_555    1_555 ?
 Mg2  Ce   Mg2  89.66(11)    171_554  172_545 ?
 Mg2  Ce   Mg3  52.19(6)     171_554    5_555 ?
 Mg2  Ce   Mg3  111.66(8)    171_554    7_555 ?
 Mg2  Ce   Mg3  111.66(8)    171_554    9_555 ?
 Mg2  Ce   Mg3  52.19(6)     171_554   12_555 ?
 Mg2  Ce   Si   135.17(10)   171_554    1_555 ?
 Mg2  Ce   Mg3  111.66(8)    172_545    5_555 ?
 Mg2  Ce   Mg3  52.19(6)     172_545    7_555 ?
 Mg2  Ce   Mg3  52.19(6)     172_545    9_555 ?
 Mg2  Ce   Mg3  111.66(8)    172_545   12_555 ?
 Mg2  Ce   Si   135.17(10)   172_545    1_555 ?
 Mg3  Ce   Mg3  160.201(5)     5_555    7_555 ?
 Mg3  Ce   Mg3  88.306(5)      5_555    9_555 ?
 Mg3  Ce   Mg3  88.306(5)      5_555   12_555 ?
 Mg3  Ce   Mg4  80.100(18)     5_555  145_544 ?
 Mg3  Ce   Si   99.90(3)       5_555    1_555 ?
 Mg3  Ce   Mg3  88.306(5)      7_555    9_555 ?
 Mg3  Ce   Mg3  88.306(5)      7_555   12_555 ?
 Mg3  Ce   Mg4  80.100(18)     7_555  145_544 ?
 Mg3  Ce   Si   99.90(3)       7_555    1_555 ?
 Mg3  Ce   Mg3  160.201(5)     9_555   12_555 ?
 Mg3  Ce   Mg4  80.100(18)     9_555  145_544 ?
 Mg3  Ce   Si   99.90(3)       9_555    1_555 ?
 Mg3  Ce   Mg4  80.100(18)    12_555  145_544 ?
 Mg3  Ce   Si   99.90(3)      12_555    1_555 ?
 Mg4  Ce   Si   179.96(3)    145_544    1_555 ?
 Ce   Mg1  Ce   72.84(7)       1_555    5_555 ?
 Ce   Mg1  Ce   72.84(7)       1_555    9_555 ?
 Ce   Mg1  Mg1  113.36(12)     1_555   52_555 ?
 Ce   Mg1  Mg1  113.36(12)     1_555   99_555 ?
 Ce   Mg1  Mg1  171.99(13)     1_555  146_555 ?
 Ce   Mg1  Mg2  122.06(12)     1_555   52_555 ?
 Ce   Mg1  Mg2  122.06(12)     1_555   99_555 ?
 Ce   Mg1  Mg2  62.78(10)      1_555  146_555 ?
 Ce   Mg1  Mg3  130.64(8)      1_555    1_555 ?
 Ce   Mg1  Mg3  67.92(7)       1_555    5_555 ?
 Ce   Mg1  Mg3  67.92(7)       1_555    9_555 ?
 Ce   Mg1  Ce   72.84(7)       5_555    9_555 ?
 Ce   Mg1  Mg1  171.99(14)     5_555   52_555 ?
 Ce   Mg1  Mg1  113.36(12)     5_555   99_555 ?
 Ce   Mg1  Mg1  113.36(12)     5_555  146_555 ?
 Ce   Mg1  Mg2  62.78(10)      5_555   52_555 ?
 Ce   Mg1  Mg2  122.06(12)     5_555   99_555 ?
 Ce   Mg1  Mg2  122.06(12)     5_555  146_555 ?
 Ce   Mg1  Mg3  67.92(7)       5_555    1_555 ?
 Ce   Mg1  Mg3  130.64(8)      5_555    5_555 ?
 Ce   Mg1  Mg3  67.92(8)       5_555    9_555 ?
 Ce   Mg1  Mg1  113.36(12)     9_555   52_555 ?
 Ce   Mg1  Mg1  171.99(14)     9_555   99_555 ?
 Ce   Mg1  Mg1  113.36(12)     9_555  146_555 ?
 Ce   Mg1  Mg2  122.06(12)     9_555   52_555 ?
 Ce   Mg1  Mg2  62.78(10)      9_555   99_555 ?
 Ce   Mg1  Mg2  122.06(12)     9_555  146_555 ?
 Ce   Mg1  Mg3  67.92(7)       9_555    1_555 ?
 Ce   Mg1  Mg3  67.92(8)       9_555    5_555 ?
 Ce   Mg1  Mg3  130.64(8)      9_555    9_555 ?
 Mg1  Mg1  Mg1  60.00(13)     52_555   99_555 ?
 Mg1  Mg1  Mg1  60.00(13)     52_555  146_555 ?
 Mg1  Mg1  Mg2  109.20(15)    52_555   52_555 ?
 Mg1  Mg1  Mg2  59.78(12)     52_555   99_555 ?
 Mg1  Mg1  Mg2  59.78(12)     52_555  146_555 ?
 Mg1  Mg1  Mg3  109.02(13)    52_555    1_555 ?
 Mg1  Mg1  Mg3  57.38(11)     52_555    5_555 ?
 Mg1  Mg1  Mg3  109.02(13)    52_555    9_555 ?
 Mg1  Mg1  Si   144.74(12)    52_555    1_555 ?
 Mg1  Mg1  Mg1  60.00(13)     99_555  146_555 ?
 Mg1  Mg1  Mg2  59.78(12)     99_555   52_555 ?
 Mg1  Mg1  Mg2  109.20(15)    99_555   99_555 ?
 Mg1  Mg1  Mg2  59.78(12)     99_555  146_555 ?
 Mg1  Mg1  Mg3  109.02(13)    99_555    1_555 ?
 Mg1  Mg1  Mg3  109.02(13)    99_555    5_555 ?
 Mg1  Mg1  Mg3  57.38(11)     99_555    9_555 ?
 Mg1  Mg1  Si   144.74(12)    99_555    1_555 ?
 Mg1  Mg1  Mg2  59.78(12)    146_555   52_555 ?
 Mg1  Mg1  Mg2  59.78(12)    146_555   99_555 ?
 Mg1  Mg1  Mg2  109.20(15)   146_555  146_555 ?
 Mg1  Mg1  Mg3  57.38(11)    146_555    1_555 ?
 Mg1  Mg1  Mg3  109.02(13)   146_555    5_555 ?
 Mg1  Mg1  Mg3  109.02(13)   146_555    9_555 ?
 Mg1  Mg1  Si   144.74(12)   146_555    1_555 ?
 Mg2  Mg1  Mg2  112.65(15)    52_555   99_555 ?
 Mg2  Mg1  Mg2  112.65(15)    52_555  146_555 ?
 Mg2  Mg1  Mg3  62.15(10)     52_555    1_555 ?
 Mg2  Mg1  Mg3  166.58(13)    52_555    5_555 ?
 Mg2  Mg1  Mg3  62.15(10)     52_555    9_555 ?
 Mg2  Mg1  Si   106.06(10)    52_555    1_555 ?
 Mg2  Mg1  Mg2  112.65(15)    99_555  146_555 ?
 Mg2  Mg1  Mg3  62.15(10)     99_555    1_555 ?
 Mg2  Mg1  Mg3  62.15(10)     99_555    5_555 ?
 Mg2  Mg1  Mg3  166.58(13)    99_555    9_555 ?
 Mg2  Mg1  Si   106.06(10)    99_555    1_555 ?
 Mg2  Mg1  Mg3  166.58(13)   146_555    1_555 ?
 Mg2  Mg1  Mg3  62.15(10)    146_555    5_555 ?
 Mg2  Mg1  Mg3  62.15(10)    146_555    9_555 ?
 Mg2  Mg1  Si   106.06(10)   146_555    1_555 ?
 Mg3  Mg1  Mg3  119.79(8)      1_555    5_555 ?
 Mg3  Mg1  Mg3  119.79(8)      1_555    9_555 ?
 Mg3  Mg1  Si   87.36(7)       1_555    1_555 ?
 Mg3  Mg1  Mg3  119.79(8)      5_555    9_555 ?
 Mg3  Mg1  Si   87.36(7)       5_555    1_555 ?
 Mg3  Mg1  Si   87.36(7)       9_555    1_555 ?
 Ce   Mg2  Ce   117.30(6)     53_555  105_555 ?
 Ce   Mg2  Ce   117.30(7)     53_555  145_555 ?
 Ce   Mg2  Mg1  64.03(10)     53_555   52_555 ?
 Ce   Mg2  Mg1  114.95(12)    53_555   99_555 ?
 Ce   Mg2  Mg1  114.95(12)    53_555  146_555 ?
 Ce   Mg2  Mg2  60.10(9)      53_555   26_655 ?
 Ce   Mg2  Mg2  60.10(9)      53_555   27_565 ?
 Ce   Mg2  Mg2  135.17(11)    53_555   28_556 ?
 Ce   Mg2  Mg3  66.41(6)      53_555   52_555 ?
 Ce   Mg2  Mg3  66.41(7)      53_555   59_555 ?
 Ce   Mg2  Mg3  168.47(7)     53_555  104_555 ?
 Ce   Mg2  Mg4  80.44(7)      53_555    1_555 ?
 Ce   Mg2  Ce   117.30(7)    105_555  145_555 ?
 Ce   Mg2  Mg1  114.95(12)   105_555   52_555 ?
 Ce   Mg2  Mg1  64.03(10)    105_555   99_555 ?
 Ce   Mg2  Mg1  114.95(12)   105_555  146_555 ?
 Ce   Mg2  Mg2  60.10(9)     105_555   26_655 ?
 Ce   Mg2  Mg2  135.17(11)   105_555   27_565 ?
 Ce   Mg2  Mg2  60.10(9)     105_555   28_556 ?
 Ce   Mg2  Mg3  66.41(6)     105_555   52_555 ?
 Ce   Mg2  Mg3  168.47(7)    105_555   59_555 ?
 Ce   Mg2  Mg3  66.41(7)     105_555  104_555 ?
 Ce   Mg2  Mg4  80.44(7)     105_555    1_555 ?
 Ce   Mg2  Mg1  114.95(12)   145_555   52_555 ?
 Ce   Mg2  Mg1  114.95(12)   145_555   99_555 ?
 Ce   Mg2  Mg1  64.03(10)    145_555  146_555 ?
 Ce   Mg2  Mg2  135.17(11)   145_555   26_655 ?
 Ce   Mg2  Mg2  60.10(9)     145_555   27_565 ?
 Ce   Mg2  Mg2  60.10(9)     145_555   28_556 ?
 Ce   Mg2  Mg3  168.47(7)    145_555   52_555 ?
 Ce   Mg2  Mg3  66.41(7)     145_555   59_555 ?
 Ce   Mg2  Mg3  66.41(7)     145_555  104_555 ?
 Ce   Mg2  Mg4  80.44(7)     145_555    1_555 ?
 Mg1  Mg2  Mg1  60.44(12)     52_555   99_555 ?
 Mg1  Mg2  Mg1  60.44(12)     52_555  146_555 ?
 Mg1  Mg2  Mg2  103.45(14)    52_555   26_655 ?
 Mg1  Mg2  Mg2  103.45(14)    52_555   27_565 ?
 Mg1  Mg2  Mg2  160.80(16)    52_555   28_556 ?
 Mg1  Mg2  Mg3  55.67(10)     52_555   52_555 ?
 Mg1  Mg2  Mg3  55.67(10)     52_555   59_555 ?
 Mg1  Mg2  Mg3  104.44(12)    52_555  104_555 ?
 Mg1  Mg2  Mg4  144.47(13)    52_555    1_555 ?
 Mg1  Mg2  Mg1  60.44(12)     99_555  146_555 ?
 Mg1  Mg2  Mg2  103.45(14)    99_555   26_655 ?
 Mg1  Mg2  Mg2  160.80(16)    99_555   27_565 ?
 Mg1  Mg2  Mg2  103.45(14)    99_555   28_556 ?
 Mg1  Mg2  Mg3  55.67(10)     99_555   52_555 ?
 Mg1  Mg2  Mg3  104.44(12)    99_555   59_555 ?
 Mg1  Mg2  Mg3  55.67(10)     99_555  104_555 ?
 Mg1  Mg2  Mg4  144.47(13)    99_555    1_555 ?
 Mg1  Mg2  Mg2  160.80(16)   146_555   26_655 ?
 Mg1  Mg2  Mg2  103.45(14)   146_555   27_565 ?
 Mg1  Mg2  Mg2  103.45(14)   146_555   28_556 ?
 Mg1  Mg2  Mg3  104.44(12)   146_555   52_555 ?
 Mg1  Mg2  Mg3  55.67(10)    146_555   59_555 ?
 Mg1  Mg2  Mg3  55.67(10)    146_555  104_555 ?
 Mg1  Mg2  Mg4  144.47(13)   146_555    1_555 ?
 Mg2  Mg2  Mg2  90.00(12)     26_655   27_565 ?
 Mg2  Mg2  Mg2  90.00(12)     26_655   28_556 ?
 Mg2  Mg2  Mg3  56.36(9)      26_655   52_555 ?
 Mg2  Mg2  Mg3  126.06(11)    26_655   59_555 ?
 Mg2  Mg2  Mg3  126.06(11)    26_655  104_555 ?
 Mg2  Mg2  Mg4  54.74(9)      26_655    1_555 ?
 Mg2  Mg2  Mg2  90.00(12)     27_565   28_556 ?
 Mg2  Mg2  Mg3  126.06(11)    27_565   52_555 ?
 Mg2  Mg2  Mg3  56.36(9)      27_565   59_555 ?
 Mg2  Mg2  Mg3  126.06(11)    27_565  104_555 ?
 Mg2  Mg2  Mg4  54.74(9)      27_565    1_555 ?
 Mg2  Mg2  Mg3  126.06(11)    28_556   52_555 ?
 Mg2  Mg2  Mg3  126.06(11)    28_556   59_555 ?
 Mg2  Mg2  Mg3  56.36(9)      28_556  104_555 ?
 Mg2  Mg2  Mg4  54.74(9)      28_556    1_555 ?
 Mg3  Mg2  Mg3  107.80(7)     52_555   59_555 ?
 Mg3  Mg2  Mg3  107.80(7)     52_555  104_555 ?
 Mg3  Mg2  Mg4  111.10(7)     52_555    1_555 ?
 Mg3  Mg2  Mg3  107.80(7)     59_555  104_555 ?
 Mg3  Mg2  Mg4  111.10(7)     59_555    1_555 ?
 Mg3  Mg2  Mg4  111.10(7)    104_555    1_555 ?
 Ce   Mg3  Ce   70.2009(5)     5_555    9_555 ?
 Ce   Mg3  Ce   180.0000(13    5_555  151_555 ?
 Ce   Mg3  Ce   109.7991(7)    5_555  155_555 ?
 Ce   Mg3  Mg1  63.83(8)       5_555    1_555 ?
 Ce   Mg3  Mg1  63.83(8)       5_555   26_555 ?
 Ce   Mg3  Mg1  116.17(10)     5_555  146_555 ?
 Ce   Mg3  Mg1  116.17(10)     5_555  169_555 ?
 Ce   Mg3  Mg2  61.40(7)       5_555   52_555 ?
 Ce   Mg3  Mg2  61.40(7)       5_555   75_455 ?
 Ce   Mg3  Mg2  118.60(9)      5_555   99_555 ?
 Ce   Mg3  Mg2  118.60(9)      5_555  124_455 ?
 Ce   Mg3  Ce   109.7991(7)    9_555  151_555 ?
 Ce   Mg3  Ce   180.0000(13    9_555  155_555 ?
 Ce   Mg3  Mg1  63.83(8)       9_555    1_555 ?
 Ce   Mg3  Mg1  63.83(8)       9_555   26_555 ?
 Ce   Mg3  Mg1  116.17(10)     9_555  146_555 ?
 Ce   Mg3  Mg1  116.17(10)     9_555  169_555 ?
 Ce   Mg3  Mg2  118.60(9)      9_555   52_555 ?
 Ce   Mg3  Mg2  118.60(9)      9_555   75_455 ?
 Ce   Mg3  Mg2  61.40(7)       9_555   99_555 ?
 Ce   Mg3  Mg2  61.40(7)       9_555  124_455 ?
 Ce   Mg3  Ce   70.2009(5)   151_555  155_555 ?
 Ce   Mg3  Mg1  116.17(10)   151_555    1_555 ?
 Ce   Mg3  Mg1  116.17(10)   151_555   26_555 ?
 Ce   Mg3  Mg1  63.83(8)     151_555  146_555 ?
 Ce   Mg3  Mg1  63.83(8)     151_555  169_555 ?
 Ce   Mg3  Mg2  118.60(9)    151_555   52_555 ?
 Ce   Mg3  Mg2  118.60(9)    151_555   75_455 ?
 Ce   Mg3  Mg2  61.40(7)     151_555   99_555 ?
 Ce   Mg3  Mg2  61.40(7)     151_555  124_455 ?
 Ce   Mg3  Mg1  116.17(10)   155_555    1_555 ?
 Ce   Mg3  Mg1  116.17(10)   155_555   26_555 ?
 Ce   Mg3  Mg1  63.83(8)     155_555  146_555 ?
 Ce   Mg3  Mg1  63.83(8)     155_555  169_555 ?
 Ce   Mg3  Mg2  61.40(7)     155_555   52_555 ?
 Ce   Mg3  Mg2  61.40(7)     155_555   75_455 ?
 Ce   Mg3  Mg2  118.60(9)    155_555   99_555 ?
 Ce   Mg3  Mg2  118.60(9)    155_555  124_455 ?
 Mg1  Mg3  Mg1  114.75(16)     1_555   26_555 ?
 Mg1  Mg3  Mg1  65.25(12)      1_555  146_555 ?
 Mg1  Mg3  Mg1  180.00(18)     1_555  169_555 ?
 Mg1  Mg3  Mg2  62.19(11)      1_555   52_555 ?
 Mg1  Mg3  Mg2  117.81(14)     1_555   75_455 ?
 Mg1  Mg3  Mg2  62.19(11)      1_555   99_555 ?
 Mg1  Mg3  Mg2  117.81(14)     1_555  124_455 ?
 Mg1  Mg3  Mg1  180.00(18)    26_555  146_555 ?
 Mg1  Mg3  Mg1  65.25(12)     26_555  169_555 ?
 Mg1  Mg3  Mg2  117.81(14)    26_555   52_555 ?
 Mg1  Mg3  Mg2  62.19(11)     26_555   75_455 ?
 Mg1  Mg3  Mg2  117.81(14)    26_555   99_555 ?
 Mg1  Mg3  Mg2  62.19(11)     26_555  124_455 ?
 Mg1  Mg3  Mg1  114.75(16)   146_555  169_555 ?
 Mg1  Mg3  Mg2  62.19(11)    146_555   52_555 ?
 Mg1  Mg3  Mg2  117.81(14)   146_555   75_455 ?
 Mg1  Mg3  Mg2  62.19(11)    146_555   99_555 ?
 Mg1  Mg3  Mg2  117.81(14)   146_555  124_455 ?
 Mg1  Mg3  Mg2  117.81(14)   169_555   52_555 ?
 Mg1  Mg3  Mg2  62.19(11)    169_555   75_455 ?
 Mg1  Mg3  Mg2  117.81(14)   169_555   99_555 ?
 Mg1  Mg3  Mg2  62.19(11)    169_555  124_455 ?
 Mg2  Mg3  Mg2  67.28(10)     52_555   75_455 ?
 Mg2  Mg3  Mg2  112.72(13)    52_555   99_555 ?
 Mg2  Mg3  Mg2  180.00(15)    52_555  124_455 ?
 Mg2  Mg3  Mg2  180.00(15)    75_455   99_555 ?
 Mg2  Mg3  Mg2  112.72(13)    75_455  124_455 ?
 Mg2  Mg3  Mg2  67.28(10)     99_555  124_455 ?
 Ce   Mg4  Ce   180.0000(13   53_555   55_556 ?
 Ce   Mg4  Ce   90.0000(6)    53_555  105_555 ?
 Ce   Mg4  Ce   90.0000(6)    53_555  107_565 ?
 Ce   Mg4  Ce   90.00(3)      53_555  145_555 ?
 Ce   Mg4  Ce   90.00(3)      53_555  147_655 ?
 Ce   Mg4  Mg2  54.74(6)      53_555    1_555 ?
 Ce   Mg4  Mg2  125.26(9)     53_555    2_566 ?
 Ce   Mg4  Mg2  125.26(9)     53_555    3_656 ?
 Ce   Mg4  Mg2  54.74(6)      53_555    4_665 ?
 Ce   Mg4  Mg2  125.26(9)     53_555   25_666 ?
 Ce   Mg4  Mg2  54.74(6)      53_555   26_655 ?
 Ce   Mg4  Mg2  54.74(6)      53_555   27_565 ?
 Ce   Mg4  Mg2  125.26(9)     53_555   28_556 ?
 Ce   Mg4  Ce   90.0000(6)    55_556  105_555 ?
 Ce   Mg4  Ce   90.0000(6)    55_556  107_565 ?
 Ce   Mg4  Ce   90.00(3)      55_556  145_555 ?
 Ce   Mg4  Ce   90.00(3)      55_556  147_655 ?
 Ce   Mg4  Mg2  125.26(9)     55_556    1_555 ?
 Ce   Mg4  Mg2  54.74(6)      55_556    2_566 ?
 Ce   Mg4  Mg2  54.74(6)      55_556    3_656 ?
 Ce   Mg4  Mg2  125.26(9)     55_556    4_665 ?
 Ce   Mg4  Mg2  54.74(6)      55_556   25_666 ?
 Ce   Mg4  Mg2  125.26(9)     55_556   26_655 ?
 Ce   Mg4  Mg2  125.26(9)     55_556   27_565 ?
 Ce   Mg4  Mg2  54.74(6)      55_556   28_556 ?
 Ce   Mg4  Ce   180.0000(13  105_555  107_565 ?
 Ce   Mg4  Ce   90.00(3)     105_555  145_555 ?
 Ce   Mg4  Ce   90.00(3)     105_555  147_655 ?
 Ce   Mg4  Mg2  54.74(6)     105_555    1_555 ?
 Ce   Mg4  Mg2  125.26(9)    105_555    2_566 ?
 Ce   Mg4  Mg2  54.74(6)     105_555    3_656 ?
 Ce   Mg4  Mg2  125.26(9)    105_555    4_665 ?
 Ce   Mg4  Mg2  125.26(9)    105_555   25_666 ?
 Ce   Mg4  Mg2  54.74(6)     105_555   26_655 ?
 Ce   Mg4  Mg2  125.26(9)    105_555   27_565 ?
 Ce   Mg4  Mg2  54.74(6)     105_555   28_556 ?
 Ce   Mg4  Ce   90.00(3)     107_565  145_555 ?
 Ce   Mg4  Ce   90.00(3)     107_565  147_655 ?
 Ce   Mg4  Mg2  125.26(9)    107_565    1_555 ?
 Ce   Mg4  Mg2  54.74(6)     107_565    2_566 ?
 Ce   Mg4  Mg2  125.26(9)    107_565    3_656 ?
 Ce   Mg4  Mg2  54.74(6)     107_565    4_665 ?
 Ce   Mg4  Mg2  54.74(6)     107_565   25_666 ?
 Ce   Mg4  Mg2  125.26(9)    107_565   26_655 ?
 Ce   Mg4  Mg2  54.74(6)     107_565   27_565 ?
 Ce   Mg4  Mg2  125.26(9)    107_565   28_556 ?
 Ce   Mg4  Ce   180.00(6)    145_555  147_655 ?
 Ce   Mg4  Mg2  54.74(7)     145_555    1_555 ?
 Ce   Mg4  Mg2  54.74(7)     145_555    2_566 ?
 Ce   Mg4  Mg2  125.26(10)   145_555    3_656 ?
 Ce   Mg4  Mg2  125.26(10)   145_555    4_665 ?
 Ce   Mg4  Mg2  125.26(10)   145_555   25_666 ?
 Ce   Mg4  Mg2  125.26(10)   145_555   26_655 ?
 Ce   Mg4  Mg2  54.74(7)     145_555   27_565 ?
 Ce   Mg4  Mg2  54.74(7)     145_555   28_556 ?
 Ce   Mg4  Mg2  125.26(10)   147_655    1_555 ?
 Ce   Mg4  Mg2  125.26(10)   147_655    2_566 ?
 Ce   Mg4  Mg2  54.74(7)     147_655    3_656 ?
 Ce   Mg4  Mg2  54.74(7)     147_655    4_665 ?
 Ce   Mg4  Mg2  54.74(7)     147_655   25_666 ?
 Ce   Mg4  Mg2  54.74(7)     147_655   26_655 ?
 Ce   Mg4  Mg2  125.26(10)   147_655   27_565 ?
 Ce   Mg4  Mg2  125.26(10)   147_655   28_556 ?
 Mg2  Mg4  Mg2  109.47(13)     1_555    2_566 ?
 Mg2  Mg4  Mg2  109.47(13)     1_555    3_656 ?
 Mg2  Mg4  Mg2  109.47(13)     1_555    4_665 ?
 Mg2  Mg4  Mg2  179.97(16)     1_555   25_666 ?
 Mg2  Mg4  Mg2  70.53(11)      1_555   26_655 ?
 Mg2  Mg4  Mg2  70.53(11)      1_555   27_565 ?
 Mg2  Mg4  Mg2  70.53(11)      1_555   28_556 ?
 Mg2  Mg4  Mg2  109.47(13)     2_566    3_656 ?
 Mg2  Mg4  Mg2  109.47(13)     2_566    4_665 ?
 Mg2  Mg4  Mg2  70.53(11)      2_566   25_666 ?
 Mg2  Mg4  Mg2  179.97(16)     2_566   26_655 ?
 Mg2  Mg4  Mg2  70.53(11)      2_566   27_565 ?
 Mg2  Mg4  Mg2  70.53(11)      2_566   28_556 ?
 Mg2  Mg4  Mg2  109.47(13)     3_656    4_665 ?
 Mg2  Mg4  Mg2  70.53(11)      3_656   25_666 ?
 Mg2  Mg4  Mg2  70.53(11)      3_656   26_655 ?
 Mg2  Mg4  Mg2  179.97(16)     3_656   27_565 ?
 Mg2  Mg4  Mg2  70.53(11)      3_656   28_556 ?
 Mg2  Mg4  Mg2  70.53(11)      4_665   25_666 ?
 Mg2  Mg4  Mg2  70.53(11)      4_665   26_655 ?
 Mg2  Mg4  Mg2  70.53(11)      4_665   27_565 ?
 Mg2  Mg4  Mg2  179.97(16)     4_665   28_556 ?
 Mg2  Mg4  Mg2  109.47(13)    25_666   26_655 ?
 Mg2  Mg4  Mg2  109.47(13)    25_666   27_565 ?
 Mg2  Mg4  Mg2  109.47(13)    25_666   28_556 ?
 Mg2  Mg4  Mg2  109.47(13)    26_655   27_565 ?
 Mg2  Mg4  Mg2  109.47(13)    26_655   28_556 ?
 Mg2  Mg4  Mg2  109.47(13)    27_565   28_556 ?
 Ce   Si   Ce   180.00(8)      1_555    3_555 ?
 Ce   Si   Ce   90.00(4)       1_555    5_555 ?
 Ce   Si   Ce   90.00(4)       1_555    7_555 ?
 Ce   Si   Ce   90.00(4)       1_555    9_555 ?
 Ce   Si   Ce   90.00(4)       1_555   11_555 ?
 Ce   Si   Mg1  54.74(6)       1_555    1_555 ?
 Ce   Si   Mg1  54.74(6)       1_555    2_555 ?
 Ce   Si   Mg1  125.26(10)     1_555    3_555 ?
 Ce   Si   Mg1  125.26(10)     1_555    4_555 ?
 Ce   Si   Mg1  125.26(10)     1_555   25_555 ?
 Ce   Si   Mg1  125.26(10)     1_555   26_555 ?
 Ce   Si   Mg1  54.74(6)       1_555   27_555 ?
 Ce   Si   Mg1  54.74(6)       1_555   28_555 ?
 Ce   Si   Ce   90.00(4)       3_555    5_555 ?
 Ce   Si   Ce   90.00(4)       3_555    7_555 ?
 Ce   Si   Ce   90.00(4)       3_555    9_555 ?
 Ce   Si   Ce   90.00(4)       3_555   11_555 ?
 Ce   Si   Mg1  125.26(10)     3_555    1_555 ?
 Ce   Si   Mg1  125.26(10)     3_555    2_555 ?
 Ce   Si   Mg1  54.74(6)       3_555    3_555 ?
 Ce   Si   Mg1  54.74(6)       3_555    4_555 ?
 Ce   Si   Mg1  54.74(6)       3_555   25_555 ?
 Ce   Si   Mg1  54.74(6)       3_555   26_555 ?
 Ce   Si   Mg1  125.26(10)     3_555   27_555 ?
 Ce   Si   Mg1  125.26(10)     3_555   28_555 ?
 Ce   Si   Ce   180.0000(13    5_555    7_555 ?
 Ce   Si   Ce   90.0000(6)     5_555    9_555 ?
 Ce   Si   Ce   90.0000(6)     5_555   11_555 ?
 Ce   Si   Mg1  54.74(6)       5_555    1_555 ?
 Ce   Si   Mg1  125.26(9)      5_555    2_555 ?
 Ce   Si   Mg1  125.26(9)      5_555    3_555 ?
 Ce   Si   Mg1  54.74(6)       5_555    4_555 ?
 Ce   Si   Mg1  125.26(9)      5_555   25_555 ?
 Ce   Si   Mg1  54.74(6)       5_555   26_555 ?
 Ce   Si   Mg1  54.74(6)       5_555   27_555 ?
 Ce   Si   Mg1  125.26(9)      5_555   28_555 ?
 Ce   Si   Ce   90.0000(6)     7_555    9_555 ?
 Ce   Si   Ce   90.0000(6)     7_555   11_555 ?
 Ce   Si   Mg1  125.26(9)      7_555    1_555 ?
 Ce   Si   Mg1  54.74(6)       7_555    2_555 ?
 Ce   Si   Mg1  54.74(6)       7_555    3_555 ?
 Ce   Si   Mg1  125.26(9)      7_555    4_555 ?
 Ce   Si   Mg1  54.74(6)       7_555   25_555 ?
 Ce   Si   Mg1  125.26(9)      7_555   26_555 ?
 Ce   Si   Mg1  125.26(9)      7_555   27_555 ?
 Ce   Si   Mg1  54.74(6)       7_555   28_555 ?
 Ce   Si   Ce   180.0000(13    9_555   11_555 ?
 Ce   Si   Mg1  54.74(6)       9_555    1_555 ?
 Ce   Si   Mg1  125.26(9)      9_555    2_555 ?
 Ce   Si   Mg1  54.74(6)       9_555    3_555 ?
 Ce   Si   Mg1  125.26(9)      9_555    4_555 ?
 Ce   Si   Mg1  125.26(9)      9_555   25_555 ?
 Ce   Si   Mg1  54.74(6)       9_555   26_555 ?
 Ce   Si   Mg1  125.26(9)      9_555   27_555 ?
 Ce   Si   Mg1  54.74(6)       9_555   28_555 ?
 Ce   Si   Mg1  125.26(9)     11_555    1_555 ?
 Ce   Si   Mg1  54.74(6)      11_555    2_555 ?
 Ce   Si   Mg1  125.26(9)     11_555    3_555 ?
 Ce   Si   Mg1  54.74(6)      11_555    4_555 ?
 Ce   Si   Mg1  54.74(6)      11_555   25_555 ?
 Ce   Si   Mg1  125.26(9)     11_555   26_555 ?
 Ce   Si   Mg1  54.74(6)      11_555   27_555 ?
 Ce   Si   Mg1  125.26(9)     11_555   28_555 ?
 Mg1  Si   Mg1  109.47(10)     1_555    2_555 ?
 Mg1  Si   Mg1  109.47(10)     1_555    3_555 ?
 Mg1  Si   Mg1  109.47(10)     1_555    4_555 ?
 Mg1  Si   Mg1  180.00(12)     1_555   25_555 ?
 Mg1  Si   Mg1  70.53(8)       1_555   26_555 ?
 Mg1  Si   Mg1  70.53(8)       1_555   27_555 ?
 Mg1  Si   Mg1  70.53(8)       1_555   28_555 ?
 Mg1  Si   Mg1  109.47(10)     2_555    3_555 ?
 Mg1  Si   Mg1  109.47(10)     2_555    4_555 ?
 Mg1  Si   Mg1  70.53(8)       2_555   25_555 ?
 Mg1  Si   Mg1  180.00(12)     2_555   26_555 ?
 Mg1  Si   Mg1  70.53(8)       2_555   27_555 ?
 Mg1  Si   Mg1  70.53(8)       2_555   28_555 ?
 Mg1  Si   Mg1  109.47(10)     3_555    4_555 ?
 Mg1  Si   Mg1  70.53(8)       3_555   25_555 ?
 Mg1  Si   Mg1  70.53(8)       3_555   26_555 ?
 Mg1  Si   Mg1  180.00(12)     3_555   27_555 ?
 Mg1  Si   Mg1  70.53(8)       3_555   28_555 ?
 Mg1  Si   Mg1  70.53(8)       4_555   25_555 ?
 Mg1  Si   Mg1  70.53(8)       4_555   26_555 ?
 Mg1  Si   Mg1  70.53(8)       4_555   27_555 ?
 Mg1  Si   Mg1  180.00(12)     4_555   28_555 ?
 Mg1  Si   Mg1  109.47(10)    25_555   26_555 ?
 Mg1  Si   Mg1  109.47(10)    25_555   27_555 ?
 Mg1  Si   Mg1  109.47(10)    25_555   28_555 ?
 Mg1  Si   Mg1  109.47(10)    26_555   27_555 ?
 Mg1  Si   Mg1  109.47(10)    26_555   28_555 ?
 Mg1  Si   Mg1  109.47(10)    27_555   28_555 ?
