# Supplementary material
Source: publisher figshare collection journal article supplement (https://acs.figshare.com/ndownloader/files/3725533)
Supplement: Supplementary file 1 [file 3725533 › la623sb.txt]

data_La6Mg23Sb                    
 
# 5. CHEMICAL DATA
 
_chemical_formula_sum             'La6 Mg23 Sb'
_chemical_formula_weight          1514.34

loop_
    _atom_type_symbol               
    _atom_type_scat_Cromer_Mann_a1 
    _atom_type_scat_Cromer_Mann_b1 
    _atom_type_scat_Cromer_Mann_a2 
    _atom_type_scat_Cromer_Mann_b2 
    _atom_type_scat_Cromer_Mann_a3 
    _atom_type_scat_Cromer_Mann_b3 
    _atom_type_scat_Cromer_Mann_a4 
    _atom_type_scat_Cromer_Mann_b4 
    _atom_type_scat_Cromer_Mann_c 
    _atom_type_scat_dispersion_real 
    _atom_type_scat_dispersion_imag 
    _atom_type_scat_source          
la    20.57800   2.94817  19.59900   0.24448  11.37270  18.77260
       3.28719 133.12399   2.14678  -1.71600   9.03600
 International_Tables_for_Crystallography_Vol.C(1991)_Tables_6.1.1.4_and_6.1.1.5
mg     5.42040   2.82750   2.17350  79.26110   1.22690   0.38080
       2.30730   7.19370   0.85840   0.16500   0.17700
 International_Tables_for_Crystallography_Vol.C(1991)_Tables_6.1.1.4_and_6.1.1.5
sb    19.64180   5.30340  19.04550   0.46070   5.03710  27.90740
       2.68270  75.28250   4.59090  -0.28700   5.89400
 International_Tables_for_Crystallography_Vol.C(1991)_Tables_6.1.1.4_and_6.1.1.5
 
#=============================================================================
 
# 6. POWDER SPECIMEN AND CRYSTAL DATA
 
_symmetry_cell_setting                Cubic
_symmetry_space_group_name_H-M       'F M -3 M'
_symmetry_space_group_name_Hall      '-F 4 2 3'
 
loop_
    _symmetry_equiv_pos_as_xyz   #<--must include 'x,y,z'
'x,y,z'
'x,-y,-z'
'-x,y,-z'
'-x,-y,z'
'y,z,x'
'-y,-z,x'
'y,-z,-x'
'-y,z,-x'
'z,x,y'
'-z,x,-y'
'-z,-x,y'
'z,-x,-y'
'y,x,z'
'-y,x,-z'
'y,-x,-z'
'-y,-x,z'
'z,y,x'
'-z,-y,x'
'-z,y,-x'
'z,-y,-x'
'x,z,y'
'x,-z,-y'
'-x,-z,y'
'-x,z,-y'
'-x,-y,-z'
'-x,y,z'
'x,-y,z'
'x,y,-z'
'-y,-z,-x'
'y,z,-x'
'-y,z,x'
'y,-z,x'
'-z,-x,-y'
'z,-x,y'
'z,x,-y'
'-z,x,y'
'-y,-x,-z'
'y,-x,z'
'-y,x,z'
'y,x,-z'
'-z,-y,-x'
'z,y,-x'
'z,-y,x'
'-z,y,x'
'-x,-z,-y'
'-x,z,y'
'x,z,-y'
'x,-z,y'
'x+1/2,y+1/2,z'
'x+1/2,-y+1/2,-z'
'-x+1/2,y+1/2,-z'
'-x+1/2,-y+1/2,z'
'y+1/2,z+1/2,x'
'-y+1/2,-z+1/2,x'
'y+1/2,-z+1/2,-x'
'-y+1/2,z+1/2,-x'
'z+1/2,x+1/2,y'
'-z+1/2,x+1/2,-y'
'-z+1/2,-x+1/2,y'
'z+1/2,-x+1/2,-y'
'y+1/2,x+1/2,z'
'-y+1/2,x+1/2,-z'
'y+1/2,-x+1/2,-z'
'-y+1/2,-x+1/2,z'
'z+1/2,y+1/2,x'
'-z+1/2,-y+1/2,x'
'-z+1/2,y+1/2,-x'
'z+1/2,-y+1/2,-x'
'x+1/2,z+1/2,y'
'x+1/2,-z+1/2,-y'
'-x+1/2,-z+1/2,y'
'-x+1/2,z+1/2,-y'
'-x+1/2,-y+1/2,-z'
'-x+1/2,y+1/2,z'
'x+1/2,-y+1/2,z'
'x+1/2,y+1/2,-z'
'-y+1/2,-z+1/2,-x'
'y+1/2,z+1/2,-x'
'-y+1/2,z+1/2,x'
'y+1/2,-z+1/2,x'
'-z+1/2,-x+1/2,-y'
'z+1/2,-x+1/2,y'
'z+1/2,x+1/2,-y'
'-z+1/2,x+1/2,y'
'-y+1/2,-x+1/2,-z'
'y+1/2,-x+1/2,z'
'-y+1/2,x+1/2,z'
'y+1/2,x+1/2,-z'
'-z+1/2,-y+1/2,-x'
'z+1/2,y+1/2,-x'
'z+1/2,-y+1/2,x'
'-z+1/2,y+1/2,x'
'-x+1/2,-z+1/2,-y'
'-x+1/2,z+1/2,y'
'x+1/2,z+1/2,-y'
'x+1/2,-z+1/2,y'
'x+1/2,y,z+1/2'
'x+1/2,-y,-z+1/2'
'-x+1/2,y,-z+1/2'
'-x+1/2,-y,z+1/2'
'y+1/2,z,x+1/2'
'-y+1/2,-z,x+1/2'
'y+1/2,-z,-x+1/2'
'-y+1/2,z,-x+1/2'
'z+1/2,x,y+1/2'
'-z+1/2,x,-y+1/2'
'-z+1/2,-x,y+1/2'
'z+1/2,-x,-y+1/2'
'y+1/2,x,z+1/2'
'-y+1/2,x,-z+1/2'
'y+1/2,-x,-z+1/2'
'-y+1/2,-x,z+1/2'
'z+1/2,y,x+1/2'
'-z+1/2,-y,x+1/2'
'-z+1/2,y,-x+1/2'
'z+1/2,-y,-x+1/2'
'x+1/2,z,y+1/2'
'x+1/2,-z,-y+1/2'
'-x+1/2,-z,y+1/2'
'-x+1/2,z,-y+1/2'
'-x+1/2,-y,-z+1/2'
'-x+1/2,y,z+1/2'
'x+1/2,-y,z+1/2'
'x+1/2,y,-z+1/2'
'-y+1/2,-z,-x+1/2'
'y+1/2,z,-x+1/2'
'-y+1/2,z,x+1/2'
'y+1/2,-z,x+1/2'
'-z+1/2,-x,-y+1/2'
'z+1/2,-x,y+1/2'
'z+1/2,x,-y+1/2'
'-z+1/2,x,y+1/2'
'-y+1/2,-x,-z+1/2'
'y+1/2,-x,z+1/2'
'-y+1/2,x,z+1/2'
'y+1/2,x,-z+1/2'
'-z+1/2,-y,-x+1/2'
'z+1/2,y,-x+1/2'
'z+1/2,-y,x+1/2'
'-z+1/2,y,x+1/2'
'-x+1/2,-z,-y+1/2'
'-x+1/2,z,y+1/2'
'x+1/2,z,-y+1/2'
'x+1/2,-z,y+1/2'
'x,y+1/2,z+1/2'
'x,-y+1/2,-z+1/2'
'-x,y+1/2,-z+1/2'
'-x,-y+1/2,z+1/2'
'y,z+1/2,x+1/2'
'-y,-z+1/2,x+1/2'
'y,-z+1/2,-x+1/2'
'-y,z+1/2,-x+1/2'
'z,x+1/2,y+1/2'
'-z,x+1/2,-y+1/2'
'-z,-x+1/2,y+1/2'
'z,-x+1/2,-y+1/2'
'y,x+1/2,z+1/2'
'-y,x+1/2,-z+1/2'
'y,-x+1/2,-z+1/2'
'-y,-x+1/2,z+1/2'
'z,y+1/2,x+1/2'
'-z,-y+1/2,x+1/2'
'-z,y+1/2,-x+1/2'
'z,-y+1/2,-x+1/2'
'x,z+1/2,y+1/2'
'x,-z+1/2,-y+1/2'
'-x,-z+1/2,y+1/2'
'-x,z+1/2,-y+1/2'
'-x,-y+1/2,-z+1/2'
'-x,y+1/2,z+1/2'
'x,-y+1/2,z+1/2'
'x,y+1/2,-z+1/2'
'-y,-z+1/2,-x+1/2'
'y,z+1/2,-x+1/2'
'-y,z+1/2,x+1/2'
'y,-z+1/2,x+1/2'
'-z,-x+1/2,-y+1/2'
'z,-x+1/2,y+1/2'
'z,x+1/2,-y+1/2'
'-z,x+1/2,y+1/2'
'-y,-x+1/2,-z+1/2'
'y,-x+1/2,z+1/2'
'-y,x+1/2,z+1/2'
'y,x+1/2,-z+1/2'
'-z,-y+1/2,-x+1/2'
'z,y+1/2,-x+1/2'
'z,-y+1/2,x+1/2'
'-z,y+1/2,x+1/2'
'-x,-z+1/2,-y+1/2'
'-x,z+1/2,y+1/2'
'x,z+1/2,-y+1/2'
'x,-z+1/2,y+1/2'
 
_cell_length_a                       14.713(1)
_cell_length_b                       14.713(1)
_cell_length_c                       14.713(1)
_cell_angle_alpha                    90.00000
_cell_angle_beta                     90.00000
_cell_angle_gamma                    90.00000
_cell_volume                         3185.0(6)
_cell_formula_units_Z                4
_cell_measurement_temperature        298

_pd_spec_size_thick               0.01    # parallel to 
                                          # scattering vector
                                          # in reflection
 
_pd_spec_mount_mode                'reflection'
_pd_spec_shape                     'flat_sheet' 

_pd_char_colour                   'dark grey'
 
_pd_prep_temperature              298
#=============================================================================
 
# 7. EXPERIMENTAL DATA
 
_pd_calibration_special_details           
; 
Calibration with silicon as internal standard
;
 
_diffrn_ambient_temperature          298
_diffrn_source                   'sealed X-ray tube'
_diffrn_radiation_wavelength      1.5418
_diffrn_source_target             Cu
 
_diffrn_measurement_device_type          'Bragg-Brentano PanAlytical diddractometer'

_pd_meas_scan_method                    'step'
 
_pd_meas_number_of_points         4595
_pd_meas_2theta_range_min         8.12000
_pd_meas_2theta_range_max         100.00000
_pd_meas_2theta_range_inc         0.020004
 
#=============================================================================
 
# 8. REFINEMENT DATA
 
_pd_proc_ls_profile_function                'Pseudo-Voigt'
_pd_proc_ls_background_function           
;
linear interpolation between a set of background points with refinable heights
;

_pd_proc_ls_prof_R_factor                4.0769
_pd_proc_ls_prof_wR_factor               5.8028
_pd_proc_ls_prof_wR_expected             2.1523
 
#  The following profile R-factors are CORRECTED for background
#  The sum is extended to all non-excluded points.
#  These items are not in the current CIF standard, but are defined above
 
_pd_proc_ls_prof_cR_factor               19.0960
_pd_proc_ls_prof_cwR_factor              17.2203
_pd_proc_ls_prof_cwR_expected             6.3871
 
#  The following items are not in the CIF standard, but are defined above
 
_pd_proc_ls_prof_chi2                 7.2690
_pd_proc_ls_prof_echi2                7.2690
 
#  Items related to LS refinement
 
_refine_ls_R_I_factor                 7.2116
_refine_ls_number_reflns                   274
_refine_ls_number_parameters                16
_refine_ls_number_restraints                 0
_refine_ls_goodness_of_fit_all        2.69
_refine_ls_shift/su_max             0.05

 
# The following four items apply to angular dispersive measurements.
# 2theta minimum, maximum and increment (in degrees) are for the 
# intensities used in the refinement.
 
_pd_proc_2theta_range_min                8.1178
_pd_proc_2theta_range_max               99.9978
_pd_proc_2theta_range_inc              0.020004
_pd_proc_wavelength                    1.540560
 
_computing_structure_refinement      FULLPROF
#=============================================================================
 
# 9. ATOMIC COORDINATES AND DISPLACEMENT PARAMETERS
 
loop_
    _atom_site_label
    _atom_site_fract_x
    _atom_site_fract_y
    _atom_site_fract_z
    _atom_site_U_iso_or_equiv
    _atom_site_occupancy
    _atom_site_adp_type              # Not in version 2.0.1
    _atom_site_type_symbol
 La   0.21728(10) 0.00000     0.00000     0.0082(5)   1.00000    Uiso LA  
 Mg1   0.1730(2)   0.1730(2)   0.1730(2)   0.0188(16)  1.00000    Uiso MG  
 Mg2   0.3784(2)   0.3784(2)   0.3784(2)   0.0188(16)  1.00000    Uiso MG  
 Mg3   0.00000     0.25000     0.25000     0.0188(16)  1.00000    Uiso MG  
 Mg4   0.50000     0.50000     0.50000     0.0188(16)  1.00000    Uiso MG  
 Sb   0.00000     0.00000     0.00000     0.026(2)     1.00000   Uiso SB  
 
# Note: if the displacement parameters were refined anisotropically
# the U matrices should be given as for single-crystal studies.
 
#=============================================================================
 
# 10. DISTANCES AND ANGLES / MOLECULAR GEOMETRY 
 

loop_
   _geom_bond_atom_site_label_1
   _geom_bond_atom_site_label_2
   _geom_bond_distance
   _geom_bond_site_symmetry_2
   _geom_bond_publ_flag
La    La    4.5212(15)    5_555 ?
La    La    4.5212(15)    7_555 ?
La    La    4.5212(15)    9_555 ?
La    La    4.5212(15)   11_555 ?
La    Mg1   3.658(3)      1_555 ?
La    Mg1   3.658(3)      2_555 ?
La    Mg1   3.658(3)     27_555 ?
La    Mg1   3.658(3)     28_555 ?
La    Mg2   3.467(3)    145_544 ?
La    Mg2   3.467(3)    146_555 ?
La    Mg2   3.467(3)    171_554 ?
La    Mg2   3.467(3)    172_545 ?
La    Mg3   3.7096(2)     5_555 ?
La    Mg3   3.7096(2)     7_555 ?
La    Mg3   3.7096(2)     9_555 ?
La    Mg3   3.7096(2)    12_555 ?
La    Mg4   4.1595(15)  145_544 ?
La    Sb    3.1970(15)    1_555 ?
Mg1   La    3.658(3)      1_555 ?
Mg1   La    3.658(3)      5_555 ?
Mg1   La    3.658(3)      9_555 ?
Mg1   Mg1   3.204(4)     52_555 ?
Mg1   Mg1   3.204(4)     99_555 ?
Mg1   Mg1   3.204(4)    146_555 ?
Mg1   Mg2   3.206(4)     52_555 ?
Mg1   Mg2   3.206(4)     99_555 ?
Mg1   Mg2   3.206(4)    146_555 ?
Mg1   Mg3   3.008(3)      1_555 ?
Mg1   Mg3   3.008(3)      5_555 ?
Mg1   Mg3   3.008(3)      9_555 ?
Mg1   Sb    4.409(3)      1_555 ?
Mg2   La    3.467(3)     53_555 ?
Mg2   La    3.467(3)    105_555 ?
Mg2   La    3.467(3)    145_555 ?
Mg2   Mg1   3.206(4)     52_555 ?
Mg2   Mg1   3.206(4)     99_555 ?
Mg2   Mg1   3.206(4)    146_555 ?
Mg2   Mg2   3.578(4)     26_655 ?
Mg2   Mg2   3.578(4)     27_565 ?
Mg2   Mg2   3.578(4)     28_556 ?
Mg2   Mg3   3.215(3)     52_555 ?
Mg2   Mg3   3.215(3)     59_555 ?
Mg2   Mg3   3.215(3)    104_555 ?
Mg2   Mg4   3.099(3)      1_555 ?
Mg3   La    3.7096(2)     5_555 ?
Mg3   La    3.7096(2)     9_555 ?
Mg3   La    3.7096(2)   151_555 ?
Mg3   La    3.7096(2)   155_555 ?
Mg3   Mg1   3.008(3)      1_555 ?
Mg3   Mg1   3.008(3)     26_555 ?
Mg3   Mg1   3.008(3)    146_555 ?
Mg3   Mg1   3.008(3)    169_555 ?
Mg3   Mg2   3.215(3)     52_555 ?
Mg3   Mg2   3.215(3)     75_455 ?
Mg3   Mg2   3.215(3)     99_555 ?
Mg3   Mg2   3.215(3)    124_455 ?
Mg4   La    4.1595(15)   53_555 ?
Mg4   La    4.1595(15)   55_556 ?
Mg4   La    4.1595(15)  105_555 ?
Mg4   La    4.1595(15)  107_565 ?
Mg4   La    4.1595(15)  145_555 ?
Mg4   La    4.1595(15)  147_655 ?
Mg4   Mg2   3.099(3)      1_555 ?
Mg4   Mg2   3.099(3)      2_566 ?
Mg4   Mg2   3.099(3)      3_656 ?
Mg4   Mg2   3.099(3)      4_665 ?
Mg4   Mg2   3.099(3)     25_666 ?
Mg4   Mg2   3.099(3)     26_655 ?
Mg4   Mg2   3.099(3)     27_565 ?
Mg4   Mg2   3.099(3)     28_556 ?
Sb    La    3.1970(15)    1_555 ?
Sb    La    3.1970(15)    3_555 ?
Sb    La    3.1970(15)    5_555 ?
Sb    La    3.1970(15)    7_555 ?
Sb    La    3.1970(15)    9_555 ?
Sb    La    3.1970(15)   11_555 ?
Sb    Mg1   4.409(3)      1_555 ?
Sb    Mg1   4.409(3)      2_555 ?
Sb    Mg1   4.409(3)      3_555 ?
Sb    Mg1   4.409(3)      4_555 ?
Sb    Mg1   4.409(3)     25_555 ?
Sb    Mg1   4.409(3)     26_555 ?
Sb    Mg1   4.409(3)     27_555 ?
Sb    Mg1   4.409(3)     28_555 ?

loop_
   _geom_angle_atom_site_label_1
   _geom_angle_atom_site_label_2
   _geom_angle_atom_site_label_3
   _geom_angle
   _geom_angle_site_symmetry_1
   _geom_angle_site_symmetry_3
   _geom_angle_publ_flag
 La   La   La   90.00(3)       5_555    7_555 ?
 La   La   La   60.00(3)       5_555    9_555 ?
 La   La   La   60.00(3)       5_555   11_555 ?
 La   La   Mg1  51.83(6)       5_555    1_555 ?
 La   La   Mg1  111.47(9)      5_555    2_555 ?
 La   La   Mg1  51.83(6)       5_555   27_555 ?
 La   La   Mg1  111.47(9)      5_555   28_555 ?
 La   La   Mg2  148.03(10)     5_555  145_544 ?
 La   La   Mg2  96.81(9)       5_555  146_555 ?
 La   La   Mg2  148.03(10)     5_555  171_554 ?
 La   La   Mg2  96.81(9)       5_555  172_545 ?
 La   La   Mg3  95.26(3)       5_555    5_555 ?
 La   La   Mg3  95.26(3)       5_555    7_555 ?
 La   La   Mg3  52.45(3)       5_555    9_555 ?
 La   La   Mg3  142.45(3)      5_555   12_555 ?
 La   La   Mg4  135.00(4)      5_555  145_544 ?
 La   La   La   60.00(3)       7_555    9_555 ?
 La   La   La   60.00(3)       7_555   11_555 ?
 La   La   Mg1  111.47(9)      7_555    1_555 ?
 La   La   Mg1  51.83(6)       7_555    2_555 ?
 La   La   Mg1  111.47(9)      7_555   27_555 ?
 La   La   Mg1  51.83(6)       7_555   28_555 ?
 La   La   Mg2  96.81(9)       7_555  145_544 ?
 La   La   Mg2  148.03(10)     7_555  146_555 ?
 La   La   Mg2  96.81(9)       7_555  171_554 ?
 La   La   Mg2  148.03(10)     7_555  172_545 ?
 La   La   Mg3  95.26(3)       7_555    5_555 ?
 La   La   Mg3  95.26(3)       7_555    7_555 ?
 La   La   Mg3  142.45(3)      7_555    9_555 ?
 La   La   Mg3  52.45(3)       7_555   12_555 ?
 La   La   Mg4  135.00(4)      7_555  145_544 ?
 La   La   La   90.00(3)       9_555   11_555 ?
 La   La   Mg1  51.83(6)       9_555    1_555 ?
 La   La   Mg1  111.47(9)      9_555    2_555 ?
 La   La   Mg1  111.47(9)      9_555   27_555 ?
 La   La   Mg1  51.83(6)       9_555   28_555 ?
 La   La   Mg2  148.03(10)     9_555  145_544 ?
 La   La   Mg2  96.81(9)       9_555  146_555 ?
 La   La   Mg2  96.81(9)       9_555  171_554 ?
 La   La   Mg2  148.03(10)     9_555  172_545 ?
 La   La   Mg3  52.45(3)       9_555    5_555 ?
 La   La   Mg3  142.45(3)      9_555    7_555 ?
 La   La   Mg3  95.26(3)       9_555    9_555 ?
 La   La   Mg3  95.26(3)       9_555   12_555 ?
 La   La   Mg4  135.00(4)      9_555  145_544 ?
 La   La   Mg1  111.47(9)     11_555    1_555 ?
 La   La   Mg1  51.83(6)      11_555    2_555 ?
 La   La   Mg1  51.83(6)      11_555   27_555 ?
 La   La   Mg1  111.47(9)     11_555   28_555 ?
 La   La   Mg2  96.81(9)      11_555  145_544 ?
 La   La   Mg2  148.03(10)    11_555  146_555 ?
 La   La   Mg2  148.03(10)    11_555  171_554 ?
 La   La   Mg2  96.81(9)      11_555  172_545 ?
 La   La   Mg3  142.45(3)     11_555    5_555 ?
 La   La   Mg3  52.45(3)      11_555    7_555 ?
 La   La   Mg3  95.26(3)      11_555    9_555 ?
 La   La   Mg3  95.26(3)      11_555   12_555 ?
 La   La   Mg4  135.00(4)     11_555  145_544 ?
 Mg1  La   Mg1  159.48(14)     1_555    2_555 ?
 Mg1  La   Mg1  88.18(11)      1_555   27_555 ?
 Mg1  La   Mg1  88.18(11)      1_555   28_555 ?
 Mg1  La   Mg2  147.13(15)     1_555  145_544 ?
 Mg1  La   Mg2  53.39(9)       1_555  146_555 ?
 Mg1  La   Mg2  97.00(12)      1_555  171_554 ?
 Mg1  La   Mg2  97.00(12)      1_555  172_545 ?
 Mg1  La   Mg3  48.18(6)       1_555    5_555 ?
 Mg1  La   Mg3  135.48(10)     1_555    7_555 ?
 Mg1  La   Mg3  48.18(6)       1_555    9_555 ?
 Mg1  La   Mg3  135.48(10)     1_555   12_555 ?
 Mg1  La   Mg4  100.26(8)      1_555  145_544 ?
 Mg1  La   Sb   79.74(8)       1_555    1_555 ?
 Mg1  La   Mg1  88.18(11)      2_555   27_555 ?
 Mg1  La   Mg1  88.18(11)      2_555   28_555 ?
 Mg1  La   Mg2  53.39(9)       2_555  145_544 ?
 Mg1  La   Mg2  147.13(15)     2_555  146_555 ?
 Mg1  La   Mg2  97.00(12)      2_555  171_554 ?
 Mg1  La   Mg2  97.00(12)      2_555  172_545 ?
 Mg1  La   Mg3  135.48(10)     2_555    5_555 ?
 Mg1  La   Mg3  48.18(6)       2_555    7_555 ?
 Mg1  La   Mg3  135.48(10)     2_555    9_555 ?
 Mg1  La   Mg3  48.18(6)       2_555   12_555 ?
 Mg1  La   Mg4  100.26(8)      2_555  145_544 ?
 Mg1  La   Sb   79.74(8)       2_555    1_555 ?
 Mg1  La   Mg1  159.48(14)    27_555   28_555 ?
 Mg1  La   Mg2  97.00(12)     27_555  145_544 ?
 Mg1  La   Mg2  97.00(12)     27_555  146_555 ?
 Mg1  La   Mg2  147.13(15)    27_555  171_554 ?
 Mg1  La   Mg2  53.39(9)      27_555  172_545 ?
 Mg1  La   Mg3  135.48(10)    27_555    5_555 ?
 Mg1  La   Mg3  48.18(6)      27_555    7_555 ?
 Mg1  La   Mg3  48.18(6)      27_555    9_555 ?
 Mg1  La   Mg3  135.48(10)    27_555   12_555 ?
 Mg1  La   Mg4  100.26(8)     27_555  145_544 ?
 Mg1  La   Sb   79.74(8)      27_555    1_555 ?
 Mg1  La   Mg2  97.00(12)     28_555  145_544 ?
 Mg1  La   Mg2  97.00(12)     28_555  146_555 ?
 Mg1  La   Mg2  53.39(9)      28_555  171_554 ?
 Mg1  La   Mg2  147.13(15)    28_555  172_545 ?
 Mg1  La   Mg3  48.18(6)      28_555    5_555 ?
 Mg1  La   Mg3  135.48(10)    28_555    7_555 ?
 Mg1  La   Mg3  135.48(10)    28_555    9_555 ?
 Mg1  La   Mg3  48.18(6)      28_555   12_555 ?
 Mg1  La   Mg4  100.26(8)     28_555  145_544 ?
 Mg1  La   Sb   79.74(8)      28_555    1_555 ?
 Mg2  La   Mg2  93.73(12)    145_544  146_555 ?
 Mg2  La   Mg2  62.13(10)    145_544  171_554 ?
 Mg2  La   Mg2  62.13(10)    145_544  172_545 ?
 Mg2  La   Mg3  115.02(9)    145_544    5_555 ?
 Mg2  La   Mg3  53.10(7)     145_544    7_555 ?
 Mg2  La   Mg3  115.02(9)    145_544    9_555 ?
 Mg2  La   Mg3  53.10(7)     145_544   12_555 ?
 Mg2  La   Mg4  46.87(7)     145_544  145_544 ?
 Mg2  La   Sb   133.13(11)   145_544    1_555 ?
 Mg2  La   Mg2  62.13(10)    146_555  171_554 ?
 Mg2  La   Mg2  62.13(10)    146_555  172_545 ?
 Mg2  La   Mg3  53.10(7)     146_555    5_555 ?
 Mg2  La   Mg3  115.02(9)    146_555    7_555 ?
 Mg2  La   Mg3  53.10(7)     146_555    9_555 ?
 Mg2  La   Mg3  115.02(9)    146_555   12_555 ?
 Mg2  La   Mg4  46.87(7)     146_555  145_544 ?
 Mg2  La   Sb   133.13(11)   146_555    1_555 ?
 Mg2  La   Mg2  93.73(12)    171_554  172_545 ?
 Mg2  La   Mg3  53.10(7)     171_554    5_555 ?
 Mg2  La   Mg3  115.02(9)    171_554    7_555 ?
 Mg2  La   Mg3  115.02(9)    171_554    9_555 ?
 Mg2  La   Mg3  53.10(7)     171_554   12_555 ?
 Mg2  La   Mg4  46.87(7)     171_554  145_544 ?
 Mg2  La   Sb   133.13(11)   171_554    1_555 ?
 Mg2  La   Mg3  115.02(9)    172_545    5_555 ?
 Mg2  La   Mg3  53.10(7)     172_545    7_555 ?
 Mg2  La   Mg3  53.10(7)     172_545    9_555 ?
 Mg2  La   Mg3  115.02(9)    172_545   12_555 ?
 Mg2  La   Mg4  46.87(7)     172_545  145_544 ?
 Mg2  La   Sb   133.13(11)   172_545    1_555 ?
 Mg3  La   Mg3  165.092(4)     5_555    7_555 ?
 Mg3  La   Mg3  89.036(4)      5_555    9_555 ?
 Mg3  La   Mg3  89.036(4)      5_555   12_555 ?
 Mg3  La   Mg4  82.55(2)       5_555  145_544 ?
 Mg3  La   Sb   97.45(3)       5_555    1_555 ?
 Mg3  La   Mg3  89.036(4)      7_555    9_555 ?
 Mg3  La   Mg3  89.036(4)      7_555   12_555 ?
 Mg3  La   Mg4  82.55(2)       7_555  145_544 ?
 Mg3  La   Sb   97.45(3)       7_555    1_555 ?
 Mg3  La   Mg3  165.092(4)     9_555   12_555 ?
 Mg3  La   Mg4  82.55(2)       9_555  145_544 ?
 Mg3  La   Sb   97.45(3)       9_555    1_555 ?
 Mg3  La   Mg4  82.55(2)      12_555  145_544 ?
 Mg3  La   Sb   97.45(3)      12_555    1_555 ?
 Mg4  La   Sb   180.00(3)    145_544    1_555 ?
 La   Mg1  La   76.33(7)       1_555    5_555 ?
 La   Mg1  La   76.33(7)       1_555    9_555 ?
 La   Mg1  Mg1  111.47(12)     1_555   52_555 ?
 La   Mg1  Mg1  111.47(12)     1_555   99_555 ?
 La   Mg1  Mg1  169.74(13)     1_555  146_555 ?
 La   Mg1  Mg2  122.26(12)     1_555   52_555 ?
 La   Mg1  Mg2  122.26(12)     1_555   99_555 ?
 La   Mg1  Mg2  60.25(10)      1_555  146_555 ?
 La   Mg1  Mg3  132.45(8)      1_555    1_555 ?
 La   Mg1  Mg3  66.80(7)       1_555    5_555 ?
 La   Mg1  Mg3  66.80(7)       1_555    9_555 ?
 La   Mg1  Sb   45.53(6)       1_555    1_555 ?
 La   Mg1  La   76.33(7)       5_555    9_555 ?
 La   Mg1  Mg1  169.74(14)     5_555   52_555 ?
 La   Mg1  Mg1  111.47(13)     5_555   99_555 ?
 La   Mg1  Mg1  111.47(12)     5_555  146_555 ?
 La   Mg1  Mg2  60.25(10)      5_555   52_555 ?
 La   Mg1  Mg2  122.26(12)     5_555   99_555 ?
 La   Mg1  Mg2  122.26(13)     5_555  146_555 ?
 La   Mg1  Mg3  66.80(7)       5_555    1_555 ?
 La   Mg1  Mg3  132.45(8)      5_555    5_555 ?
 La   Mg1  Mg3  66.80(8)       5_555    9_555 ?
 La   Mg1  Sb   45.53(6)       5_555    1_555 ?
 La   Mg1  Mg1  111.47(13)     9_555   52_555 ?
 La   Mg1  Mg1  169.74(14)     9_555   99_555 ?
 La   Mg1  Mg1  111.47(12)     9_555  146_555 ?
 La   Mg1  Mg2  122.26(12)     9_555   52_555 ?
 La   Mg1  Mg2  60.25(10)      9_555   99_555 ?
 La   Mg1  Mg2  122.26(13)     9_555  146_555 ?
 La   Mg1  Mg3  66.80(7)       9_555    1_555 ?
 La   Mg1  Mg3  66.80(8)       9_555    5_555 ?
 La   Mg1  Mg3  132.45(8)      9_555    9_555 ?
 La   Mg1  Sb   45.53(6)       9_555    1_555 ?
 Mg1  Mg1  Mg1  60.00(13)     52_555   99_555 ?
 Mg1  Mg1  Mg1  60.00(13)     52_555  146_555 ?
 Mg1  Mg1  Mg2  109.49(16)    52_555   52_555 ?
 Mg1  Mg1  Mg2  60.01(13)     52_555   99_555 ?
 Mg1  Mg1  Mg2  60.01(13)     52_555  146_555 ?
 Mg1  Mg1  Mg3  109.39(13)    52_555    1_555 ?
 Mg1  Mg1  Mg3  57.81(11)     52_555    5_555 ?
 Mg1  Mg1  Mg3  109.39(13)    52_555    9_555 ?
 Mg1  Mg1  Sb   144.74(12)    52_555    1_555 ?
 Mg1  Mg1  Mg1  60.00(13)     99_555  146_555 ?
 Mg1  Mg1  Mg2  60.01(13)     99_555   52_555 ?
 Mg1  Mg1  Mg2  109.49(16)    99_555   99_555 ?
 Mg1  Mg1  Mg2  60.01(13)     99_555  146_555 ?
 Mg1  Mg1  Mg3  109.39(13)    99_555    1_555 ?
 Mg1  Mg1  Mg3  109.39(13)    99_555    5_555 ?
 Mg1  Mg1  Mg3  57.81(11)     99_555    9_555 ?
 Mg1  Mg1  Sb   144.74(12)    99_555    1_555 ?
 Mg1  Mg1  Mg2  60.01(13)    146_555   52_555 ?
 Mg1  Mg1  Mg2  60.01(13)    146_555   99_555 ?
 Mg1  Mg1  Mg2  109.49(16)   146_555  146_555 ?
 Mg1  Mg1  Mg3  57.81(11)    146_555    1_555 ?
 Mg1  Mg1  Mg3  109.39(13)   146_555    5_555 ?
 Mg1  Mg1  Mg3  109.39(13)   146_555    9_555 ?
 Mg1  Mg1  Sb   144.74(12)   146_555    1_555 ?
 Mg2  Mg1  Mg2  112.90(16)    52_555   99_555 ?
 Mg2  Mg1  Mg2  112.90(16)    52_555  146_555 ?
 Mg2  Mg1  Mg3  62.23(11)     52_555    1_555 ?
 Mg2  Mg1  Mg3  167.30(14)    52_555    5_555 ?
 Mg2  Mg1  Mg3  62.23(11)     52_555    9_555 ?
 Mg2  Mg1  Sb   105.78(11)    52_555    1_555 ?
 Mg2  Mg1  Mg2  112.90(16)    99_555  146_555 ?
 Mg2  Mg1  Mg3  62.23(11)     99_555    1_555 ?
 Mg2  Mg1  Mg3  62.23(11)     99_555    5_555 ?
 Mg2  Mg1  Mg3  167.30(14)    99_555    9_555 ?
 Mg2  Mg1  Sb   105.78(11)    99_555    1_555 ?
 Mg2  Mg1  Mg3  167.30(14)   146_555    1_555 ?
 Mg2  Mg1  Mg3  62.23(11)    146_555    5_555 ?
 Mg2  Mg1  Mg3  62.23(11)    146_555    9_555 ?
 Mg2  Mg1  Sb   105.78(11)   146_555    1_555 ?
 Mg3  Mg1  Mg3  119.71(8)      1_555    5_555 ?
 Mg3  Mg1  Mg3  119.71(8)      1_555    9_555 ?
 Mg3  Mg1  Sb   86.92(7)       1_555    1_555 ?
 Mg3  Mg1  Mg3  119.71(8)      5_555    9_555 ?
 Mg3  Mg1  Sb   86.92(7)       5_555    1_555 ?
 Mg3  Mg1  Sb   86.92(7)       9_555    1_555 ?
 La   Mg2  La   116.06(7)     53_555  105_555 ?
 La   Mg2  La   116.06(8)     53_555  145_555 ?
 La   Mg2  Mg1  66.36(11)     53_555   52_555 ?
 La   Mg2  Mg1  116.55(13)    53_555   99_555 ?
 La   Mg2  Mg1  116.55(13)    53_555  146_555 ?
 La   Mg2  Mg2  58.93(10)     53_555   26_655 ?
 La   Mg2  Mg2  58.93(10)     53_555   27_565 ?
 La   Mg2  Mg2  133.13(12)    53_555   28_556 ?
 La   Mg2  Mg3  67.32(7)      53_555   52_555 ?
 La   Mg2  Mg3  67.32(8)      53_555   59_555 ?
 La   Mg2  Mg3  170.68(8)     53_555  104_555 ?
 La   Mg2  Mg4  78.40(7)      53_555    1_555 ?
 La   Mg2  La   116.06(8)    105_555  145_555 ?
 La   Mg2  Mg1  116.55(13)   105_555   52_555 ?
 La   Mg2  Mg1  66.36(11)    105_555   99_555 ?
 La   Mg2  Mg1  116.55(13)   105_555  146_555 ?
 La   Mg2  Mg2  58.93(10)    105_555   26_655 ?
 La   Mg2  Mg2  133.13(12)   105_555   27_565 ?
 La   Mg2  Mg2  58.93(10)    105_555   28_556 ?
 La   Mg2  Mg3  67.32(7)     105_555   52_555 ?
 La   Mg2  Mg3  170.68(8)    105_555   59_555 ?
 La   Mg2  Mg3  67.32(8)     105_555  104_555 ?
 La   Mg2  Mg4  78.40(7)     105_555    1_555 ?
 La   Mg2  Mg1  116.55(13)   145_555   52_555 ?
 La   Mg2  Mg1  116.55(13)   145_555   99_555 ?
 La   Mg2  Mg1  66.36(11)    145_555  146_555 ?
 La   Mg2  Mg2  133.13(13)   145_555   26_655 ?
 La   Mg2  Mg2  58.93(10)    145_555   27_565 ?
 La   Mg2  Mg2  58.93(10)    145_555   28_556 ?
 La   Mg2  Mg3  170.68(8)    145_555   52_555 ?
 La   Mg2  Mg3  67.32(7)     145_555   59_555 ?
 La   Mg2  Mg3  67.32(7)     145_555  104_555 ?
 La   Mg2  Mg4  78.40(8)     145_555    1_555 ?
 Mg1  Mg2  Mg1  59.97(13)     52_555   99_555 ?
 Mg1  Mg2  Mg1  59.97(13)     52_555  146_555 ?
 Mg1  Mg2  Mg2  103.65(15)    52_555   26_655 ?
 Mg1  Mg2  Mg2  103.65(15)    52_555   27_565 ?
 Mg1  Mg2  Mg2  160.51(17)    52_555   28_556 ?
 Mg1  Mg2  Mg3  55.86(10)     52_555   52_555 ?
 Mg1  Mg2  Mg3  55.86(10)     52_555   59_555 ?
 Mg1  Mg2  Mg3  104.32(12)    52_555  104_555 ?
 Mg1  Mg2  Mg4  144.75(14)    52_555    1_555 ?
 Mg1  Mg2  Mg1  59.97(13)     99_555  146_555 ?
 Mg1  Mg2  Mg2  103.65(15)    99_555   26_655 ?
 Mg1  Mg2  Mg2  160.51(17)    99_555   27_565 ?
 Mg1  Mg2  Mg2  103.65(15)    99_555   28_556 ?
 Mg1  Mg2  Mg3  55.86(10)     99_555   52_555 ?
 Mg1  Mg2  Mg3  104.32(12)    99_555   59_555 ?
 Mg1  Mg2  Mg3  55.86(10)     99_555  104_555 ?
 Mg1  Mg2  Mg4  144.75(14)    99_555    1_555 ?
 Mg1  Mg2  Mg2  160.51(17)   146_555   26_655 ?
 Mg1  Mg2  Mg2  103.65(15)   146_555   27_565 ?
 Mg1  Mg2  Mg2  103.65(15)   146_555   28_556 ?
 Mg1  Mg2  Mg3  104.32(12)   146_555   52_555 ?
 Mg1  Mg2  Mg3  55.86(10)    146_555   59_555 ?
 Mg1  Mg2  Mg3  55.86(10)    146_555  104_555 ?
 Mg1  Mg2  Mg4  144.75(14)   146_555    1_555 ?
 Mg2  Mg2  Mg2  90.00(13)     26_655   27_565 ?
 Mg2  Mg2  Mg2  90.00(13)     26_655   28_556 ?
 Mg2  Mg2  Mg3  56.19(10)     26_655   52_555 ?
 Mg2  Mg2  Mg3  125.98(12)    26_655   59_555 ?
 Mg2  Mg2  Mg3  125.98(12)    26_655  104_555 ?
 Mg2  Mg2  Mg4  54.74(10)     26_655    1_555 ?
 Mg2  Mg2  Mg2  90.00(13)     27_565   28_556 ?
 Mg2  Mg2  Mg3  125.98(12)    27_565   52_555 ?
 Mg2  Mg2  Mg3  56.19(10)     27_565   59_555 ?
 Mg2  Mg2  Mg3  125.98(12)    27_565  104_555 ?
 Mg2  Mg2  Mg4  54.74(10)     27_565    1_555 ?
 Mg2  Mg2  Mg3  125.98(12)    28_556   52_555 ?
 Mg2  Mg2  Mg3  125.98(12)    28_556   59_555 ?
 Mg2  Mg2  Mg3  56.19(10)     28_556  104_555 ?
 Mg2  Mg2  Mg4  54.74(10)     28_556    1_555 ?
 Mg3  Mg2  Mg3  107.98(7)     52_555   59_555 ?
 Mg3  Mg2  Mg3  107.98(7)     52_555  104_555 ?
 Mg3  Mg2  Mg4  110.93(8)     52_555    1_555 ?
 Mg3  Mg2  Mg3  107.98(7)     59_555  104_555 ?
 Mg3  Mg2  Mg4  110.93(8)     59_555    1_555 ?
 Mg3  Mg2  Mg4  110.93(8)    104_555    1_555 ?
 La   Mg3  La   75.09155       5_555    9_555 ?
 La   Mg3  La   180.00000      5_555  151_555 ?
 La   Mg3  La   104.90846      5_555  155_555 ?
 La   Mg3  Mg1  65.02(8)       5_555    1_555 ?
 La   Mg3  Mg1  65.02(8)       5_555   26_555 ?
 La   Mg3  Mg1  114.98(10)     5_555  146_555 ?
 La   Mg3  Mg1  114.98(10)     5_555  169_555 ?
 La   Mg3  Mg2  59.58(7)       5_555   52_555 ?
 La   Mg3  Mg2  59.58(7)       5_555   75_455 ?
 La   Mg3  Mg2  120.42(10)     5_555   99_555 ?
 La   Mg3  Mg2  120.42(10)     5_555  124_455 ?
 La   Mg3  La   104.90846      9_555  151_555 ?
 La   Mg3  La   180.00000      9_555  155_555 ?
 La   Mg3  Mg1  65.02(8)       9_555    1_555 ?
 La   Mg3  Mg1  65.02(8)       9_555   26_555 ?
 La   Mg3  Mg1  114.98(10)     9_555  146_555 ?
 La   Mg3  Mg1  114.98(10)     9_555  169_555 ?
 La   Mg3  Mg2  120.42(10)     9_555   52_555 ?
 La   Mg3  Mg2  120.42(10)     9_555   75_455 ?
 La   Mg3  Mg2  59.58(7)       9_555   99_555 ?
 La   Mg3  Mg2  59.58(7)       9_555  124_455 ?
 La   Mg3  La   75.09155     151_555  155_555 ?
 La   Mg3  Mg1  114.98(10)   151_555    1_555 ?
 La   Mg3  Mg1  114.98(10)   151_555   26_555 ?
 La   Mg3  Mg1  65.02(8)     151_555  146_555 ?
 La   Mg3  Mg1  65.02(8)     151_555  169_555 ?
 La   Mg3  Mg2  120.42(10)   151_555   52_555 ?
 La   Mg3  Mg2  120.42(10)   151_555   75_455 ?
 La   Mg3  Mg2  59.58(7)     151_555   99_555 ?
 La   Mg3  Mg2  59.58(7)     151_555  124_455 ?
 La   Mg3  Mg1  114.98(10)   155_555    1_555 ?
 La   Mg3  Mg1  114.98(10)   155_555   26_555 ?
 La   Mg3  Mg1  65.02(8)     155_555  146_555 ?
 La   Mg3  Mg1  65.02(8)     155_555  169_555 ?
 La   Mg3  Mg2  59.58(7)     155_555   52_555 ?
 La   Mg3  Mg2  59.58(7)     155_555   75_455 ?
 La   Mg3  Mg2  120.42(10)   155_555   99_555 ?
 La   Mg3  Mg2  120.42(10)   155_555  124_455 ?
 Mg1  Mg3  Mg1  115.62(16)     1_555   26_555 ?
 Mg1  Mg3  Mg1  64.38(12)      1_555  146_555 ?
 Mg1  Mg3  Mg1  180.00(18)     1_555  169_555 ?
 Mg1  Mg3  Mg2  61.91(11)      1_555   52_555 ?
 Mg1  Mg3  Mg2  118.09(15)     1_555   75_455 ?
 Mg1  Mg3  Mg2  61.91(11)      1_555   99_555 ?
 Mg1  Mg3  Mg2  118.09(15)     1_555  124_455 ?
 Mg1  Mg3  Mg1  180.00(18)    26_555  146_555 ?
 Mg1  Mg3  Mg1  64.38(12)     26_555  169_555 ?
 Mg1  Mg3  Mg2  118.09(15)    26_555   52_555 ?
 Mg1  Mg3  Mg2  61.91(11)     26_555   75_455 ?
 Mg1  Mg3  Mg2  118.09(15)    26_555   99_555 ?
 Mg1  Mg3  Mg2  61.91(11)     26_555  124_455 ?
 Mg1  Mg3  Mg1  115.62(16)   146_555  169_555 ?
 Mg1  Mg3  Mg2  61.91(11)    146_555   52_555 ?
 Mg1  Mg3  Mg2  118.09(15)   146_555   75_455 ?
 Mg1  Mg3  Mg2  61.91(11)    146_555   99_555 ?
 Mg1  Mg3  Mg2  118.09(15)   146_555  124_455 ?
 Mg1  Mg3  Mg2  118.09(15)   169_555   52_555 ?
 Mg1  Mg3  Mg2  61.91(11)    169_555   75_455 ?
 Mg1  Mg3  Mg2  118.09(15)   169_555   99_555 ?
 Mg1  Mg3  Mg2  61.91(11)    169_555  124_455 ?
 Mg2  Mg3  Mg2  67.62(11)     52_555   75_455 ?
 Mg2  Mg3  Mg2  112.38(14)    52_555   99_555 ?
 Mg2  Mg3  Mg2  180.00(17)    52_555  124_455 ?
 Mg2  Mg3  Mg2  180.00(17)    75_455   99_555 ?
 Mg2  Mg3  Mg2  112.38(14)    75_455  124_455 ?
 Mg2  Mg3  Mg2  67.62(11)     99_555  124_455 ?
 La   Mg4  La   179.96043     53_555   55_556 ?
 La   Mg4  La   90.00000      53_555  105_555 ?
 La   Mg4  La   90.00001      53_555  107_565 ?
 La   Mg4  La   90.00(4)      53_555  145_555 ?
 La   Mg4  La   90.00(4)      53_555  147_655 ?
 La   Mg4  Mg2  54.74(7)      53_555    1_555 ?
 La   Mg4  Mg2  125.26(10)    53_555    2_566 ?
 La   Mg4  Mg2  125.26(10)    53_555    3_656 ?
 La   Mg4  Mg2  54.74(7)      53_555    4_665 ?
 La   Mg4  Mg2  125.26(10)    53_555   25_666 ?
 La   Mg4  Mg2  54.74(7)      53_555   26_655 ?
 La   Mg4  Mg2  54.74(7)      53_555   27_565 ?
 La   Mg4  Mg2  125.26(10)    53_555   28_556 ?
 La   Mg4  La   90.00001      55_556  105_555 ?
 La   Mg4  La   90.00000      55_556  107_565 ?
 La   Mg4  La   90.00(4)      55_556  145_555 ?
 La   Mg4  La   90.00(4)      55_556  147_655 ?
 La   Mg4  Mg2  125.26(10)    55_556    1_555 ?
 La   Mg4  Mg2  54.74(7)      55_556    2_566 ?
 La   Mg4  Mg2  54.74(7)      55_556    3_656 ?
 La   Mg4  Mg2  125.26(10)    55_556    4_665 ?
 La   Mg4  Mg2  54.74(7)      55_556   25_666 ?
 La   Mg4  Mg2  125.26(10)    55_556   26_655 ?
 La   Mg4  Mg2  125.26(10)    55_556   27_565 ?
 La   Mg4  Mg2  54.74(7)      55_556   28_556 ?
 La   Mg4  La   179.96043    105_555  107_565 ?
 La   Mg4  La   90.00(4)     105_555  145_555 ?
 La   Mg4  La   90.00(4)     105_555  147_655 ?
 La   Mg4  Mg2  54.74(7)     105_555    1_555 ?
 La   Mg4  Mg2  125.26(10)   105_555    2_566 ?
 La   Mg4  Mg2  54.74(7)     105_555    3_656 ?
 La   Mg4  Mg2  125.26(10)   105_555    4_665 ?
 La   Mg4  Mg2  125.26(10)   105_555   25_666 ?
 La   Mg4  Mg2  54.74(7)     105_555   26_655 ?
 La   Mg4  Mg2  125.26(10)   105_555   27_565 ?
 La   Mg4  Mg2  54.74(7)     105_555   28_556 ?
 La   Mg4  La   90.00(4)     107_565  145_555 ?
 La   Mg4  La   90.00(4)     107_565  147_655 ?
 La   Mg4  Mg2  125.26(10)   107_565    1_555 ?
 La   Mg4  Mg2  54.74(7)     107_565    2_566 ?
 La   Mg4  Mg2  125.26(10)   107_565    3_656 ?
 La   Mg4  Mg2  54.74(7)     107_565    4_665 ?
 La   Mg4  Mg2  54.74(7)     107_565   25_666 ?
 La   Mg4  Mg2  125.26(10)   107_565   26_655 ?
 La   Mg4  Mg2  54.74(7)     107_565   27_565 ?
 La   Mg4  Mg2  125.26(10)   107_565   28_556 ?
 La   Mg4  La   179.96(6)    145_555  147_655 ?
 La   Mg4  Mg2  54.74(8)     145_555    1_555 ?
 La   Mg4  Mg2  54.74(8)     145_555    2_566 ?
 La   Mg4  Mg2  125.26(11)   145_555    3_656 ?
 La   Mg4  Mg2  125.26(11)   145_555    4_665 ?
 La   Mg4  Mg2  125.26(11)   145_555   25_666 ?
 La   Mg4  Mg2  125.26(11)   145_555   26_655 ?
 La   Mg4  Mg2  54.74(8)     145_555   27_565 ?
 La   Mg4  Mg2  54.74(8)     145_555   28_556 ?
 La   Mg4  Mg2  125.26(11)   147_655    1_555 ?
 La   Mg4  Mg2  125.26(11)   147_655    2_566 ?
 La   Mg4  Mg2  54.74(8)     147_655    3_656 ?
 La   Mg4  Mg2  54.74(8)     147_655    4_665 ?
 La   Mg4  Mg2  54.74(8)     147_655   25_666 ?
 La   Mg4  Mg2  54.74(8)     147_655   26_655 ?
 La   Mg4  Mg2  125.26(11)   147_655   27_565 ?
 La   Mg4  Mg2  125.26(11)   147_655   28_556 ?
 Mg2  Mg4  Mg2  109.47(15)     1_555    2_566 ?
 Mg2  Mg4  Mg2  109.47(15)     1_555    3_656 ?
 Mg2  Mg4  Mg2  109.47(15)     1_555    4_665 ?
 Mg2  Mg4  Mg2  180.00(17)     1_555   25_666 ?
 Mg2  Mg4  Mg2  70.53(12)      1_555   26_655 ?
 Mg2  Mg4  Mg2  70.53(12)      1_555   27_565 ?
 Mg2  Mg4  Mg2  70.53(12)      1_555   28_556 ?
 Mg2  Mg4  Mg2  109.47(15)     2_566    3_656 ?
 Mg2  Mg4  Mg2  109.47(15)     2_566    4_665 ?
 Mg2  Mg4  Mg2  70.53(12)      2_566   25_666 ?
 Mg2  Mg4  Mg2  180.00(17)     2_566   26_655 ?
 Mg2  Mg4  Mg2  70.53(12)      2_566   27_565 ?
 Mg2  Mg4  Mg2  70.53(12)      2_566   28_556 ?
 Mg2  Mg4  Mg2  109.47(15)     3_656    4_665 ?
 Mg2  Mg4  Mg2  70.53(12)      3_656   25_666 ?
 Mg2  Mg4  Mg2  70.53(12)      3_656   26_655 ?
 Mg2  Mg4  Mg2  180.00(17)     3_656   27_565 ?
 Mg2  Mg4  Mg2  70.53(12)      3_656   28_556 ?
 Mg2  Mg4  Mg2  70.53(12)      4_665   25_666 ?
 Mg2  Mg4  Mg2  70.53(12)      4_665   26_655 ?
 Mg2  Mg4  Mg2  70.53(12)      4_665   27_565 ?
 Mg2  Mg4  Mg2  180.00(17)     4_665   28_556 ?
 Mg2  Mg4  Mg2  109.47(15)    25_666   26_655 ?
 Mg2  Mg4  Mg2  109.47(15)    25_666   27_565 ?
 Mg2  Mg4  Mg2  109.47(15)    25_666   28_556 ?
 Mg2  Mg4  Mg2  109.47(15)    26_655   27_565 ?
 Mg2  Mg4  Mg2  109.47(15)    26_655   28_556 ?
 Mg2  Mg4  Mg2  109.47(15)    27_565   28_556 ?
 La   Sb   La   180.00(8)      1_555    3_555 ?
 La   Sb   La   90.00(5)       1_555    5_555 ?
 La   Sb   La   90.00(5)       1_555    7_555 ?
 La   Sb   La   90.00(5)       1_555    9_555 ?
 La   Sb   La   90.00(5)       1_555   11_555 ?
 La   Sb   Mg1  54.74(6)       1_555    1_555 ?
 La   Sb   Mg1  54.74(6)       1_555    2_555 ?
 La   Sb   Mg1  125.26(10)     1_555    3_555 ?
 La   Sb   Mg1  125.26(10)     1_555    4_555 ?
 La   Sb   Mg1  125.26(10)     1_555   25_555 ?
 La   Sb   Mg1  125.26(10)     1_555   26_555 ?
 La   Sb   Mg1  54.74(6)       1_555   27_555 ?
 La   Sb   Mg1  54.74(6)       1_555   28_555 ?
 La   Sb   La   90.00(5)       3_555    5_555 ?
 La   Sb   La   90.00(5)       3_555    7_555 ?
 La   Sb   La   90.00(5)       3_555    9_555 ?
 La   Sb   La   90.00(5)       3_555   11_555 ?
 La   Sb   Mg1  125.26(10)     3_555    1_555 ?
 La   Sb   Mg1  125.26(10)     3_555    2_555 ?
 La   Sb   Mg1  54.74(6)       3_555    3_555 ?
 La   Sb   Mg1  54.74(6)       3_555    4_555 ?
 La   Sb   Mg1  54.74(6)       3_555   25_555 ?
 La   Sb   Mg1  54.74(6)       3_555   26_555 ?
 La   Sb   Mg1  125.26(10)     3_555   27_555 ?
 La   Sb   Mg1  125.26(10)     3_555   28_555 ?
 La   Sb   La   180.00000      5_555    7_555 ?
 La   Sb   La   90.00001       5_555    9_555 ?
 La   Sb   La   90.00001       5_555   11_555 ?
 La   Sb   Mg1  54.74(6)       5_555    1_555 ?
 La   Sb   Mg1  125.26(9)      5_555    2_555 ?
 La   Sb   Mg1  125.26(9)      5_555    3_555 ?
 La   Sb   Mg1  54.74(6)       5_555    4_555 ?
 La   Sb   Mg1  125.26(9)      5_555   25_555 ?
 La   Sb   Mg1  54.74(6)       5_555   26_555 ?
 La   Sb   Mg1  54.74(6)       5_555   27_555 ?
 La   Sb   Mg1  125.26(9)      5_555   28_555 ?
 La   Sb   La   90.00001       7_555    9_555 ?
 La   Sb   La   90.00001       7_555   11_555 ?
 La   Sb   Mg1  125.26(9)      7_555    1_555 ?
 La   Sb   Mg1  54.74(6)       7_555    2_555 ?
 La   Sb   Mg1  54.74(6)       7_555    3_555 ?
 La   Sb   Mg1  125.26(9)      7_555    4_555 ?
 La   Sb   Mg1  54.74(6)       7_555   25_555 ?
 La   Sb   Mg1  125.26(9)      7_555   26_555 ?
 La   Sb   Mg1  125.26(9)      7_555   27_555 ?
 La   Sb   Mg1  54.74(6)       7_555   28_555 ?
 La   Sb   La   180.00000      9_555   11_555 ?
 La   Sb   Mg1  54.74(6)       9_555    1_555 ?
 La   Sb   Mg1  125.26(9)      9_555    2_555 ?
 La   Sb   Mg1  54.74(6)       9_555    3_555 ?
 La   Sb   Mg1  125.26(9)      9_555    4_555 ?
 La   Sb   Mg1  125.26(9)      9_555   25_555 ?
 La   Sb   Mg1  54.74(6)       9_555   26_555 ?
 La   Sb   Mg1  125.26(9)      9_555   27_555 ?
 La   Sb   Mg1  54.74(6)       9_555   28_555 ?
 La   Sb   Mg1  125.26(9)     11_555    1_555 ?
 La   Sb   Mg1  54.74(6)      11_555    2_555 ?
 La   Sb   Mg1  125.26(9)     11_555    3_555 ?
 La   Sb   Mg1  54.74(6)      11_555    4_555 ?
 La   Sb   Mg1  54.74(6)      11_555   25_555 ?
 La   Sb   Mg1  125.26(9)     11_555   26_555 ?
 La   Sb   Mg1  54.74(6)      11_555   27_555 ?
 La   Sb   Mg1  125.26(9)     11_555   28_555 ?
 Mg1  Sb   Mg1  109.47(10)     1_555    2_555 ?
 Mg1  Sb   Mg1  109.47(10)     1_555    3_555 ?
 Mg1  Sb   Mg1  109.47(10)     1_555    4_555 ?
 Mg1  Sb   Mg1  180.00(12)     1_555   25_555 ?
 Mg1  Sb   Mg1  70.53(8)       1_555   26_555 ?
 Mg1  Sb   Mg1  70.53(8)       1_555   27_555 ?
 Mg1  Sb   Mg1  70.53(8)       1_555   28_555 ?
 Mg1  Sb   Mg1  109.47(10)     2_555    3_555 ?
 Mg1  Sb   Mg1  109.47(10)     2_555    4_555 ?
 Mg1  Sb   Mg1  70.53(8)       2_555   25_555 ?
 Mg1  Sb   Mg1  180.00(12)     2_555   26_555 ?
 Mg1  Sb   Mg1  70.53(8)       2_555   27_555 ?
 Mg1  Sb   Mg1  70.53(8)       2_555   28_555 ?
 Mg1  Sb   Mg1  109.47(10)     3_555    4_555 ?
 Mg1  Sb   Mg1  70.53(8)       3_555   25_555 ?
 Mg1  Sb   Mg1  70.53(8)       3_555   26_555 ?
 Mg1  Sb   Mg1  180.00(12)     3_555   27_555 ?
 Mg1  Sb   Mg1  70.53(8)       3_555   28_555 ?
 Mg1  Sb   Mg1  70.53(8)       4_555   25_555 ?
 Mg1  Sb   Mg1  70.53(8)       4_555   26_555 ?
 Mg1  Sb   Mg1  70.53(8)       4_555   27_555 ?
 Mg1  Sb   Mg1  180.00(12)     4_555   28_555 ?
 Mg1  Sb   Mg1  109.47(10)    25_555   26_555 ?
 Mg1  Sb   Mg1  109.47(10)    25_555   27_555 ?
 Mg1  Sb   Mg1  109.47(10)    25_555   28_555 ?
 Mg1  Sb   Mg1  109.47(10)    26_555   27_555 ?
 Mg1  Sb   Mg1  109.47(10)    26_555   28_555 ?
 Mg1  Sb   Mg1  109.47(10)    27_555   28_555 ?
